# 1 **An electrophysiological and behavioral model of *Paramecium*, the** 2 **“swimming neuron”**

3 Irene Elices<sup>1</sup>, Anirudh Kulkarni<sup>1,2</sup>, Nicolas Escoubet<sup>3</sup>, Léa-Laetitia Pontani<sup>3</sup>, Alexis Michel Prevost<sup>3</sup>,  
4 Romain Brette<sup>1</sup>

5 <sup>1</sup> Sorbonne Université, INSERM, CNRS, Institut de la Vision, 17 rue Moreau, F-75012 Paris,  
6 France

7 <sup>2</sup> Department of Bioengineering and Centre for Neurotechnology, Imperial College London, South  
8 Kensington Campus, SW7 2AZ London, United Kingdom

9 <sup>3</sup> Sorbonne Université, CNRS, Institut de Biologie Paris-Seine (IBPS), Laboratoire Jean Perrin  
10 (LJP), F-75005, Paris

11

12 Corresponding author: Romain Brette, [romain.brette@inserm.fr](mailto:romain.brette@inserm.fr)

13

## 14 **Abstract**

15 *Paramecium* is a large unicellular organism that swims in fresh water using cilia. When stimulated by  
16 various means (mechanically, chemically, optically, thermally), it often swims backward then turns  
17 and swims forward again in a new direction: this is called the avoiding reaction. This reaction is  
18 triggered by a calcium-based action potential. For this reason, several authors have called *Paramecium*  
19 the “swimming neuron”. Here we present an empirically constrained model of its action potential  
20 based on electrophysiology experiments on live immobilized paramecia, together with simultaneous  
21 measurement of ciliary beating using particle image velocimetry. Using these measurements and  
22 additional behavioral measurements of free swimming, we extend the electrophysiological model by  
23 coupling calcium concentration to kinematic parameters, turning it into a swimming model. In this  
24 way, we obtain a model of autonomously behaving *Paramecium*. Finally, we demonstrate how the  
25 modeled organism interacts with an environment, can follow gradients and display collective  
26 behavior. This work provides a modeling basis for investigating the physiological basis of autonomous  
27 behavior of *Paramecium* in ecological environments.

28

## 29 Introduction

30 Behavior depends on a complex interaction between a variety of physiological processes, the body and  
31 the environment. This complexity makes it challenging to develop integrative models relating the  
32 different components. Thus, a strategy is to study model organisms that are experimentally accessible  
33 and structurally simpler than vertebrates. This strategy has been applied in particular to *C. Elegans*,  
34 with its 302 neurons and a known connectome (Cohen and Denham, 2019; Cohen and Sanders, 2014;  
35 Schafer, 2018). However, electrophysiology is difficult owing to the small size of its neurons (about 3  
36  $\mu\text{m}$ ), and developing empirically valid neuromechanical models of *C. Elegans* remains challenging.  
37 More recently, other model organisms have been introduced: *Hydra*, with a few thousand neurons and  
38 the advantage of being transparent (Dupre and Yuste, 2017; Wang et al., 2020), and jellyfish *Aurelia*  
39 *aurita* (Pallasdies et al., 2019).

40 Here we propose to develop an integrative model of *Paramecium tetraurelia* (Brette, 2021), which is  
41 structurally much simpler than the abovementioned model organisms, since it is a unicellular  
42 organism, while being large enough to perform intracellular electrophysiology (about 120  $\mu\text{m}$  long  
43 (Nagel and Machemer, 2000)). *Paramecium* is a common ciliate, which swims in fresh water by beating  
44 its  $\sim 4000$  cilia (Aubusson-Fleury et al., 2015; Iftode et al., 1989; Nagel and Machemer, 2000), and feeds  
45 on smaller microorganisms (bacteria, algae, yeast). It uses chemical signals to find food, avoids  
46 obstacles thanks to mechanosensitivity, displays collective behavior, adapts to changing  
47 environmental conditions and can even learn to respond to new stimuli (Hennessey et al., 1979).

48 More than a century ago, Jennings described the basis of its behavior as “trial-and-error” (Jennings,  
49 1906). *Paramecium* normally swims in a helicoidal fashion at about 500-1000  $\mu\text{m/s}$ , but when it  
50 encounters something undesirable (obstacle, hot region, noxious substance), it produces an *avoiding*  
51 *reaction* (Fig. 1A): it briefly swims backward, then turns and swims forward in a new direction. The  
52 avoiding reaction is triggered by a calcium-based graded action potential, which can be observed in an  
53 immobilized cell in response to a current pulse (Fig. 1B). The calcium current is produced by L-type  
54 calcium channels located in the cilia (Eckert, 1972), related to the  $\text{Ca}_v1$  family found in neurons, heart  
55 and muscles of mammals (Lodh et al., 2016). Genes for many ionic channels have been found in the  
56 fully sequenced genome (Martinac et al., 2008), and a number have been electrophysiologically  
57 identified (Eckert and Brehm, 1979). Many signaling pathways of neurons have been found in  
58 *Paramecium* (Plattner and Verkhatsky, 2018). For this reason, *Paramecium* has been called a  
59 “swimming neuron” (Kung and Saimi, 1985) and there is a vast amount of information about its  
60 electrophysiology, from studies done mainly in the 1960-80s (Eckert, 1972; Eckert and Brehm, 1979).  
61 However, there is no empirically based model of its action potential.

62 We developed a model of *Paramecium*'s action potential and of its coupling with motility, which makes  
63 it a model of autonomously behaving organism. It is based on electrophysiological experiments on  
64 immobilized paramecia with simultaneous imaging of fluid motion induced by cilia beating, and  
65 behavioral measurements. We then demonstrate how the modeled organism interacts with the  
66 environment, can display chemotaxis and collective behavior.

67



68

69 **Figure 1.** The avoiding reaction of *Paramecium*. A, Typical spontaneous avoiding reaction: the ciliate swims  
70 backward, then turns and eventually resumes forward swimming, while spinning around its main axis during  
71 the entire movement. Images are separated by 150 ms, with intermediate shaded frames every 37 ms. The cell  
72 was placed in 20 mM NaCl and 0.3 mM CaCl<sub>2</sub> to induce spontaneous avoiding reactions (Kung, 1971). B,  
73 Intracellular recording of a voltage response (bottom right) to a square current pulse of amplitude 300 pA (top  
74 right) in an immobilized cell (left; A: anterior end; P: posterior end), showing a small action potential (in the  
75 standard extracellular solution, see Methods). The arrow points at a small upward inflexion due to the calcium  
76 current. Inset: *Paramecium* immobilized on a filter (background) with two electrodes. C, Velocity field of the  
77 fluid on a plane ~30 μm above the cell, calculated over the three shaded intervals shown in B. The blue arrow  
78 indicates mean velocity in the whole field, represented twice larger for clarity. C1, The fluid moves backward,  
79 which would make the cell swim forward. C2, The fluid moves forward. C3, The flow direction reverts on the  
80 posterior end, but not on the anterior right end, resulting in a swirling pattern.

81

## 82 Results

### 83 A brief overview of *Paramecium*'s action potential

84 To perform intracellular electrophysiology (see Methods, *Electrophysiology*), it is necessary to first  
85 immobilize the cell. To this end, we use a device we previously developed (Kulkarni et al., 2020), which  
86 uses a transparent filter with holes smaller than the cell and a peristaltic pump. The pump draws the  
87 extracellular solution (4 mM KCl and 1 mM CaCl<sub>2</sub>) from an outlet below the filter, immobilizing the  
88 cells against the filter (Fig. 1B, inset). Two high-resistance electrodes are then inserted into the cell  
89 and the pump is stopped. The cell is then held by the electrodes. One electrode is used to inject current,  
90 while the other is used to measure the membrane potential. *Paramecium* is a large cell (about 120 μm  
91 long and 35 μm wide for *P. tetraurelia*), which makes it isopotential (Eckert and Naitoh, 1970; Satow  
92 and Kung, 1979).

93 Depolarization opens voltage-gated calcium channels located in the ~4000 cilia (Aubusson-Fleury et  
94 al., 2015; Iftode et al., 1989; Nagel and Machemer, 2000), similar to the L-type Cav1.2 family in  
95 mammals (Lodh et al., 2016). This can be noticed on Fig. 1B as a small upward deflection before the  
96 peak of the membrane potential (arrow). This calcium current, denoted as  $I_{Ca}$ , activates rapidly (a few  
97 milliseconds). Calcium entry then makes cilia reorient, which makes them beat forward.

98 To observe the beating direction, we use 1  $\mu\text{m}$  tracer particles and estimate their velocity with particle  
99 image velocimetry (PIV, see Methods), on a plane about 30  $\mu\text{m}$  above the cell (Fig. 1C1-C3, note that  
100 fluid velocity is much smaller than swimming velocity as it is measured above the cell (Drescher et al.,  
101 2010)). Before the stimulation, the cilia beat backward to the right (Fig. 1C1), which tends to make the  
102 cell move forward, with a spiraling movement over to the left. When calcium enters the cilia, cilia  
103 reorient and beat backward, slightly to the left (Fig. 1C2), which makes the cell move backward. The  
104 calcium channels inactivate rapidly (a few milliseconds) through calcium-mediated inactivation:  
105 intraciliary calcium binds to calmodulin, which then inactivates the channels (Brehm et al., 1980;  
106 Eckert and Brehm, 1979; Eckert and Chad, 1984). Calcium is then expelled by diffusion, buffering and  
107 pumps. After calcium has entered the cilia, voltage-gated  $\text{K}^+$  channels located in the basal membrane  
108 rapidly open, producing a delayed rectifier current  $I_{Kd}$  that damps the membrane potential (Fig. 1B,  
109 just after the peak). Calcium also activates a smaller  $\text{K}^+$  current  $I_{K(Ca)}$ , which can be seen in the  
110 prolonged hyperpolarization after the stimulation.

111 After the stimulation, when calcium concentration has decreased below  $\sim 1 \mu\text{M}$  (Naitoh and Kaneko,  
112 1972), cilia revert to backward beating (Fig. 1C3). We notice a swirling pattern on Fig. 1C3, which can  
113 be attributed to an asynchronous reversal of different groups of cilia. We will show how this relates to  
114 the change in swimming direction seen on Fig. 1A.

115 We used current-clamp recordings and PIV measurements of fluid motion to build a model of the  
116 action potential together with electromotor coupling. We chose to use current-clamp rather than  
117 voltage-clamp recordings because good control is difficult to achieve with high resistance electrodes  
118 and several important processes are calcium-gated rather than voltage-gated, making voltage-clamp  
119 less relevant.

120

## 121 **Passive properties**

122 We start by estimating the passive properties (resistance, capacitance, reversal potentials) with model  
123 fitting techniques (see Methods, *Electrophysiological modeling* and *Model optimization*), and we  
124 compare with previous measurements in the literature. To this end, we use voltage responses to  
125 hyperpolarizing current pulses (duration 100 ms, amplitude 0 to -4 nA in 300 pA increments; Fig. 2A,  
126 top). Such stimuli are known to trigger different voltage-gated currents: a small inactivating calcium  
127 current (Nakaoka and Iwatsuki, 1992; Preston et al., 1992a, 1992b), and a strong inward rectifier  $\text{K}^+$   
128 current  $I_{Kir}$  (Oertel et al., 1978; Preston et al., 1990). We do not model the small calcium current, which  
129 is related to the escape reaction, an increase in swimming speed triggered by hyperpolarizing stimuli.  
130 We only model the inward rectifier current, which will allow us to estimate  $E_K$ , the reversal potential  
131 of  $\text{K}^+$ .

132 When the pulse intensity is strong, an inward current can be seen to activate after  $\sim 15$  ms. The inward  
133 rectifier current has the property to activate mainly below  $E_K$  (Lu, 2004). This can be seen by removing  
134  $\text{K}^+$  from the extracellular solution (making  $E_K = -\infty$ ). With 4 mM extracellular KCl, hyperpolarization  
135 below about -60 mV activates a strong inward current, which is largely suppressed in 0 mM KCl (Fig.  
136 2B). After the pulse, the  $\text{K}^+$  current switches from inward to outward as it passes  $E_K$ . This results in a

137 change in decay speed, which is noticeable at about -60 mV in Fig. 2A (top, arrow). We use this property  
 138 to estimate  $E_K$ .  
 139



140  
 141 **Figure 2.** Passive properties and inward rectifier current. *A*, Top: voltage responses of one cell to negative  
 142 current pulses ( $I = 0$  to  $-4$  nA in 300 pA increments; dashed lines: start and end of pulses), in the standard  
 143 extracellular solution (4 mM KCl and 1 mM  $CaCl_2$ ). The arrow points at an inflexion due to the inward rectifier  
 144 current  $I_{Kir}$ . Bottom: model responses fitted to the data, showing the inferred reversal potential of  $K^+$  ( $E_K$ ) and  
 145 the half-activation voltage  $V_{Kir}$  of the inward rectifier current. *B*, Current-voltage relationship over all cells  
 146 (mean  $\pm$  standard deviation, measured at pulse end) in 4 mM KCl (grey) and 0 mM KCl (blue). Removing  $K^+$   
 147 from the extracellular solution largely suppresses the inward current. *C*, Activation curve of the inward rectifier  
 148 current in the fitted models. The current activates below  $E_K$  ( $E_L$  is leak reversal potential). The solid curve is the  
 149 activation function with median parameters, the dashed curve is the activation function of the cell shown in *A*.  
 150 *D*, Fitted parameters over  $n = 28$  cells, grouped in passive parameters and inward rectifier parameters.

151 To this end, we fit a biophysical model consisting of a linear leak current and an inward rectifier  
 152 current  $I_{Kir}$  (Fig. 2A, bottom) (see Methods, *Electrophysiological modeling*) using the Brian 2 simulator  
 153 (Stimberg et al., 2019) with the model fitting toolbox (Teska et al., 2020), which applies differential  
 154 evolution and gradient descent for least square estimation of model parameters.

155 We modeled the inward rectifier current as a non-inactivating current with Boltzmann activation, two  
156 gates and a fixed time constant:  $I_{Kir} = g_{Kir} n_{Kir}^2 (E_K - V)$  (equations (4-5)). Figure 2C shows the  
157 activation curve  $n_{Kir}^2(V)$  of the cell shown in Fig. 2A (dashed) and the curve with median parameters  
158 (solid), which confirms that the current activates essentially below  $E_K$ .

159 We find that the resting potential  $V_0$  is  $-24.5 \text{ mV} \pm 10.6 \text{ mV}$  ( $n = 28$ ; median  $-22.5 \text{ mV}$ ; Fig. 2D). Oertel  
160 et al. (1977) previously reported about  $-23 \text{ mV}$  with a slightly different extracellular solution.  
161 Capacitance  $C$  is  $289 \pm 75 \text{ pF}$ . By comparison, *P. caudatum*, which is larger, has a capacitance of about  
162  $700 \text{ pF}$ . Since *P. caudatum* is  $200 \mu\text{m}$  long and  $46 \mu\text{m}$  wide (Machemer and Ogura, 1979) and *P.*  
163 *tetraurelia* is  $115 \mu\text{m}$  long and  $34 \mu\text{m}$  wide (Nagel and Machemer, 2000), a simple scaling would predict  
164 a capacitance  $(200 \times 46) / (115 \times 34) \approx 2.35$  times smaller for *P. tetraurelia*, i.e. about  $300 \text{ pF}$ , which is  
165 consistent with our estimates.

166 Resistance at rest  $R$  (including the contribution from  $I_{Kir}$ ) is  $126 \pm 62 \text{ M}\Omega$ . Finally, we find  $E_K = -48 \pm$   
167  $10 \text{ mV}$ , corresponding to an intracellular  $\text{K}^+$  concentration  $[\text{K}^+]_i = 29 \pm 11 \text{ mM}$ . This is consistent with  
168 estimates in the literature obtained with various methods, varying between  $18$  and  $34 \text{ mM}$  (Hansma,  
169 1974; Oertel et al., 1978; Ogura and Machemer, 1980; Oka et al., 1986).

170 We briefly describe the parameter estimation results for  $I_{Kir}$ , even though these will not be further  
171 used, as only  $E_K$  plays a role in depolarized responses. The estimates for total conductance  $g_{Kir}$  and half-  
172 activation voltage  $V_{Kir}$  are variable across cells, presumably because these parameters are not well  
173 constrained by the data ( $g_{Kir}$  and  $V_{Kir}$  cannot be estimated independently in the voltage region where  
174 channels are mostly closed). Nonetheless, the results confirm that  $I_{Kir}$  activates essentially below  $E_K$ .  
175 Activation slope ( $k_{Kir} = 32 \pm 9 \text{ mV}$ ) and time constant ( $\tau_{Kir} = 16 \pm 4 \text{ ms}$ ) are better constrained. With  
176 the estimated parameters, the inward rectifier current contributes about  $14\%$  of the resting  
177 conductance (median;  $16 \pm 14 \%$ ).

178

179

180 **A model of the deciliated cell**



181

182 **Figure 3.** The delayed rectifier current measured in deciliated cells. A, Current-voltage relationship in  
 183 deciliated cells, showing a strong delayed rectifier current for depolarized voltages. B, Top: voltage responses  
 184 of one cell to positive current pulses ( $I = 0$  to 4 nA in 300 pA increments). Bottom: responses of the two-gate  
 185 Boltzmann model fitted to the data, showing the inferred half-activation voltage of the delayed rectifier  
 186 current (dashed). C, Activation and time constant of the delayed rectifier current as a function of voltage in  
 187 fitted models, with median parameters (solid) and for the cell shown in B (dashed). D, Statistics of fitted  
 188 parameters ( $n = 16$ ).

189 Next, we analyzed the delayed rectifier current  $I_{Kd}$  responsible for repolarization. The ciliary calcium  
 190 channel can be pharmacologically blocked with W-7, but this drug is toxic to *Paramecium* (Hennessey  
 191 and Kung, 1984). Instead, we isolated the delayed rectifier current mechanically by removing the cilia  
 192 with ethanol (Machemer and Ogura, 1979; Ogura, 1981) (see Methods, *Deciliation*). This procedure  
 193 does not kill the cell, and cilia grow back after a few hours. It removes the voltage-gated calcium  
 194 channels, which are located in the cilia (Lodh et al., 2016; Machemer and Ogura, 1979), and thereby  
 195 also removes the calcium-activated  $K^+$  current  $I_{K(Ca)}$ . In addition, it is no longer necessary to use the  
 196 immobilization device (Fig. 3A, inset). As can be seen on Fig. 3A, the membrane still produces a strong  
 197 outward delayed rectifier current upon depolarization, and a strong inward current upon  
 198 hyperpolarization.

199 We fitted a Boltzmann model of the delayed rectifier current (see Methods, *Electrophysiological*  
 200 *modeling*, equations (6-7) and (12-13)),  $I_{Kd} = g_{Kd}n^2(E_K - V)$ , to responses to 100 ms depolarizing  
 201 current pulses (0 to 4 nA in 300 pA increments). This model turned out to fit the data as well as a

202 Hodgkin-Huxley model, but with fewer parameters (see Methods, *Model optimization*). Figure 3B  
203 (bottom) shows responses of this model, and Figure 3C shows the activation curve and voltage-  
204 dependent time constant with median parameters and those for the cell shown in Fig. 3B, with detailed  
205 statistics in Figure 3D. The delayed rectifier current activates at a median value of  $V_{Kd} \approx 21$  mV ( $30$   
206  $\pm 23$  mV) with a slope  $k_{Kd} \approx 7$  mV ( $9 \pm 6$  mV). The time constant peaks at  $\sim 4.1$  ms ( $4 \pm 1.3$  ms) at a  
207 voltage  $V_{\tau} \approx 23$  mV ( $26 \pm 48$  mV), with a slope  $k_{\tau} \approx 12$  mV ( $14 \pm 8$  mV).

208 Based on these results, we further simplified the model by enforcing  $V_{Kd} = V_{\tau}$  and  $k_{\tau} = 2k_{Kd}$ . This  
209 simplification slightly increases the fit error (1.82 vs. 1.8 mV;  $p = 0.009$ , two-tailed Wilcoxon test), but  
210 reduces the number of parameters. We used this simplified model in the full model of ciliated cells  
211 (leaving its parameters unconstrained).

212

### 213 **The action potential**

214 We now build a model of the action potential of ciliated cells, coupled with cilia reversal (Fig. 4A). Cilia  
215 revert with very small depolarizations, of just a few mV (Machemer, 1974). For this reason, we used  
216 two sets of pulses, large pulses from 0 to 5 nA in 300 pA increments, and small pulses from -100 to 500  
217 pA in 25 pA increments (Fig. 4A, bottom). Tip potentials could fluctuate between these two sets,  
218 therefore we aligned the traces to the median resting potential of -22 mV, and we fixed  $E_K$  at its median  
219 value of -48 mV. Simultaneously, we seeded the extracellular medium with 1  $\mu\text{m}$  tracer particles and  
220 imaged their motion at a frame rate of 30 Hz. Particle image velocimetry was then used to calculate the  
221 fluid velocity field, giving an indication of the direction of ciliary beating, as illustrated in Fig. 1C (See  
222 Methods, *Particle image velocimetry*). Figure 4B shows the cosine of the mean angle  $\alpha$  of the velocity  
223 field during stimulation, relative to the cell's anteroposterior axis: 1 means that particles flow towards  
224 the posterior end, i.e., the cell is trying to swim forward; -1 means that the cell is trying to swim  
225 backward. Thus, cilia revert for a duration longer than the pulse (120-200 ms in this cell), graded with  
226 pulse intensity.



227

228 **Figure 4.** Fitting the action potential of *Paramecium*. A, Voltage responses of a cell (top) to two sets of current  
 229 pulses (bottom), from 0 to 5 nA (in 300 pA increments) and from -100 to 300 pA (in 25 pA increments). B,  
 230 Ciliary response to the same currents, measured as the cosine of the mean angle of the velocity field, relative to  
 231 the anteroposterior axis. C, Close up of an action potential triggered by a 1.5 nA current pulse, with the model  
 232 fit (dashed). The arrow points at an upward deflection due to the calcium current. D, Ionic current calculated

233 by subtracting the estimated leak current from the capacitive current. The inward current (shaded)  
234 corresponds to the calcium current. Integrating this current yields a calcium entry corresponding to a  $10 \mu\text{M}$   
235 increase in intraciliary calcium concentration. E, Responses of the fitted model. E1, Voltage responses. E2,  
236 Ciliary responses. E3, Voltage-gated calcium current  $I_{Ca}$  (top, negative traces), delayed rectifier  $K^+$  current  $I_{Kd}$   
237 (bottom) and calcium-activated  $K^+$  current  $I_{K(Ca)}$  (top, positive traces) in the fitted model. E4, Intraciliary  
238 calcium concentration in the fitted model. The dashed lines show the ciliary reversal threshold and the half-  
239 inactivation concentration. F, Ionic currents inferred by the model for the action potential shown in C. G,  
240 Statistics of fitted parameters ( $n = 18$ ).

241 In the electrophysiological responses, we notice several differences with deciliated cells. First, an  
242 upward deflection is apparent after stimulation, as illustrated in Fig. 4C (arrow). This deflection is due  
243 to an inward current, the  $\text{Ca}^{2+}$  current. This current can be estimated by subtracting the estimated leak  
244 current from the capacitive current (passive properties estimated by model fitting, see below). With a  
245 pulse of intensity  $I = 1.5 \text{ nA}$ , we find that the inward part of that current peaks at about  $-2 \text{ nA}$  (Fig. 4D).  
246 This is an underestimation since part of the inward current may be masked by the  $K^+$  current, but it is  
247 comparable to previous estimations in voltage-clamp (Oertel et al., 1977). This current is known to  
248 activate and inactivate quickly, within a few ms (Brehm et al., 1980; Oertel et al., 1977), as can be seen  
249 on Fig. 4D. By integrating this current, we calculate that it should lead to an increase in intraciliary  
250 calcium concentration of about  $\int I / 2vF = 10 \mu\text{M}$  (a lower estimate, because of masking by  $K^+$  currents),  
251 where  $v \approx 1700 \mu\text{m}^3$  is the estimated ciliary volume (see Methods, *Electrophysiological modeling*) and  
252  $F$  is the Faraday constant. This is well above the threshold for ciliary reversal, which has been  
253 estimated at about  $1 \mu\text{M}$  by exposing Triton-extracted cells to variable concentrations of calcium  
254 (Naitoh and Kaneko, 1972).

255 In the electrophysiological response (Fig. 4A), we also observe small oscillations, due to the interplay  
256 between  $\text{Ca}^{2+}$  and  $K^+$  currents, and a pronounced hyperpolarization after the pulse. This  
257 hyperpolarization is due to a calcium-activated  $K^+$  current  $I_{K(Ca)}$ . This current has been previously  
258 characterized electrophysiologically (Saimi et al., 1983; Satow and Kung, 1980), as well as genetically  
259 and with immunocytochemistry (Valentine et al., 2012; Yano et al., 2013).

260 Thus, we included the following currents in our model: a leak current  $I_L$ , a voltage-gated calcium  
261 current  $I_{Ca}$ , with calcium-mediated inactivation, a delayed rectifier  $K^+$  current  $I_{Kd}$ , and a calcium-  
262 activated  $K^+$  current  $I_{K(Ca)}$  (see Methods, *Electrophysiological modeling*). The calcium current  $I_{Ca}$   
263 is produced by ciliary channels similar to L-type  $\text{Cav}1.2$  channels (Lodh et al., 2016). We modeled it  
264 similarly to (Eckert and Chad, 1984; Standen and Stanfield, 1982), but we allow for several inactivation  
265 binding sites (equations (14-16)). In addition, the current uses the Goldman-Hodgkin-Katz equation,  
266 which is more appropriate than the linear driving force ( $E_{Ca} - V$ ) when intra- and extracellular  
267 concentrations are very different (Hille, 2001). The calcium-activated  $K^+$  current  $I_{K(Ca)}$  is simply  
268 modelled with a conductance increasing as a Hill function of calcium concentration (equations (17-  
269 18)).

270 In addition, the model must include calcium dynamics (equation (19)). The decay of calcium  
271 concentration after the action potential may be due to a combination of processes, including diffusion  
272 towards the base, buffering (in particular by centrin), and pumps. We model this combination by a  
273 simple linear model of the calcium flux. However, this is not sufficient because there is a large calcium  
274 flux at rest through the voltage-gated calcium channels, which must also be expelled or buffered. This  
275 can be shown by a simple calculation: if the calcium current is  $\sim 2 \text{ nA}$  when the membrane is  
276 depolarized by  $\sim 20 \text{ mV}$ , then at rest the current should be about  $e^{-20 \text{ mV}/k} \times 2 \text{ nA}$  where  $k$  is the  
277 activation slope factor; with  $k = 4 \text{ mV}$ , we get  $13 \text{ pA}$ , corresponding to an influx  $J_{\text{rest}} = \frac{13 \text{ pA}}{2vF} \approx 40 \mu\text{M/s}$ .  
278 Thus, we postulate that the resting calcium concentration, about  $0.1 \mu\text{M}$  (Iwadate, 2003; Klauke and

279 Plattner, 1997), is maintained by a pump operating near that concentration, which is consistent with  
280 properties of plasma membrane calcium pumps (PMCA), also present in the cilia (Yano et al., 2015,  
281 2013). We model this pump with Michaelis-Menten kinetics.

282 Finally, we couple calcium concentration with ciliary beating angle by a Hill function (equation (20)).

283 We then fitted this complete model simultaneously to electrophysiological and motor responses to 100  
284 ms current pulses ( $n = 18$ ), while ensuring that the resting calcium concentration was  $0.1 \mu\text{M}$  (Fig. 4E).  
285 Thus, calcium concentration is not directly measured, but indirectly constrained by several processes:  
286 inactivation of  $I_{Ca}$ , activation of  $I_{K(Ca)}$ , and ciliary reversal.

287 Figures 4E1 and 4E2 show the fits for the cell shown in Figs. 4A and 4B. Consistently with previous  
288 voltage-clamp measurements (Oertel et al., 1977), the calcium current is transient and peaks at about  
289  $\sim 3.5 \text{ nA}$  (Fig. 4E3). A residual current remains, so that calcium concentration remains high during  
290 stimulation (Fig. 4E4). This is consistent with the fact that ciliary reversal can last for many seconds  
291 when the membrane is depolarized (Machemer, 1974). With large currents, calcium concentration  
292 raises to about  $22 \mu\text{M}$ , similar to previous estimations.

293 The voltage-gated potassium current is delayed relative to the calcium current, and the calcium-  
294 activated  $K^+$  current raises more slowly and is only dominant during repolarization (Fig. 4E3), with a  
295 maximum of  $0.65 \text{ nA}$ . This is consistent with previous studies of that current (Satow and Kung, 1980).  
296 Figure 4F shows the three different currents during the action potential shown in Fig. 4F. As previously  
297 argued, the calcium-activated  $K^+$  current has a small contribution to the early current (Oertel et al.,  
298 1977).

299 Over the  $n = 18$  cells, we find that the calcium current has half-activation voltage  $V_{Ca} = -1 \text{ mV}$  ( $0 \pm 6$   
300 mV), activation slope  $k = 4.3 \text{ mV}$  ( $4.3 \pm 1 \text{ mV}$ ) and time constant about  $0.9 \text{ ms}$  ( $0.9 \pm 0.4 \text{ ms}$ ) (Fig. 4G).  
301 Estimated conductance is not well constrained and often very large. This is presumably because the  
302 peak current is mainly determined by the inactivation properties, and therefore the conductance  
303 parameter is not well constrained. Half-inactivation occurs at about  $K_{Ca} = 3.7 \mu\text{M}$  ( $\log_{10}(K_{Ca} \text{ in M}) = -$   
304  $5.4 \pm 0.2$ ). This is close to patch-clamp measurements on cardiac L-type calcium channels (Höfer et al.,  
305 1997). The fitted models have about 4 binding sites ( $4.4 \pm 1.7$ ), larger than previous models (Eckert  
306 and Chad, 1984; Standen and Stanfield, 1982) (which have a single site but were not constrained by  
307 *Paramecium* data). Calcium decays with a median time constant of  $130 \text{ ms}$  and the pump operating  
308 near rest has a median maximum rate of  $87 \mu\text{M/s}$ .

309 The delayed rectifier current has similar fitted parameters as in deciliated cells (median  $k_{Kd} = 4.9 \text{ mV}$ ,  
310  $\tau_{Kd} = 4.5 \text{ ms}$ ), except half-activation tends to be lower (median  $V_{Kd} = 4 \text{ mV}$ ) – this might be because the  
311 responses are essentially below  $V_{Kd}$ , in the unsaturated part of the activation curve. The calcium-  
312 activated  $K^+$  current  $I_{K(Ca)}$  has low affinity ( $\log_{10}(K_{KCa} \text{ in M}) = -4.2 \pm 0.7$ ). This is consistent with the  
313 observation that in voltage-clamp, this current keeps on increasing for at least one second (Satow and  
314 Kung, 1980). There are about  $n_{KCa} = 3$  binding sites ( $3.5 \pm 2.3$ ).

315 Finally, cilia revert at about  $2.4 \mu\text{M}$  ( $\log_{10}(K_{\text{motor}} \text{ in M}) = -5.9 \pm 0.8$ ). This is close to measurements with  
316 triton-permeabilized cells, reporting about  $1 \mu\text{M}$ . We note that this and other concentration  
317 parameters depend on the estimation of intraciliary volume, which is approximate.

318 Overall, parameters of the fitted models are compatible with known properties of the currents and of  
319 ciliary reversal.

320

## 321 Swimming and turning

322 We now examine how *Paramecium* swims and turns, before coupling the electrophysiological model  
 323 with swimming motion.



324

325 **Figure 5. Swimming and turning.** A, Direction of fluid motion during forward swimming (blue)  
 326 backward swimming (red), relative to the anteroposterior axis. Averages are shown by arrows. B,  
 327 Example of helicoidal motion of *Paramecium*, with the oral groove facing the axis. Highlighted frames  
 328 are spaced by 750 ms. C, The translational velocity vector  $v$  is oriented along the anteroposterior axis.  
 329 The rotation vector  $\omega$  is in the dorsoventral plane (including the oral groove), making an angle  $\theta$   
 330 with the anteroposterior axis. D, Rotating movement at the end of avoiding reactions of increasing  
 331 strength (Jennings, 1904). E, Calculation of kinematic parameters  $v$ ,  $\theta$  and  $\omega$  in a spherical model  
 332 of radius  $60 \mu\text{m}$ , during successive phases of the avoiding reaction. First column: cilia beat to the  
 333 rear and right, producing an axisymmetric force field pushing the organism forward while spinning  
 334 around its axis. Local force amplitude is adjusted for a velocity of  $500 \mu\text{m/s}$ . Second column:  
 335 cilia revert and now beat to the front and right, pushing the organism backward. Third column:  
 336 anterior left cilia revert back to the initial direction while anterior right cilia still beat towards  
 337 the front, and posterior cilia partially revert, beating to the right. Translational velocity is now  
 338 0 and the rotation axis tilts to about  $34^\circ$ . Spinning speed  $\omega$  also increases by a factor four. Fourth  
 column: all cilia revert back to the initial beating direction. F, Measurement of fluid velocity in a  
 sample cell beyond the anterior end (top) and beyond the posterior end (bottom). Scale bar:  $100 \mu\text{m}$ .  
 G, Scatter plot of Posterior reversal (ms) vs Anterior reversal (ms).

339 *the posterior end (bottom), in response to positive current pulses (1-5 nA), relative to the anteroposterior axis.*  
340 *G, Over  $n = 9$  cells, the direction of posterior motion reverts back about 30 ms after anterior fluid motion*  
341 *(dashed line: linear regression). Reversal duration is calculated as the time when  $\cos(\alpha)$  crosses 0, relative to*  
342 *the pulse end time.*

343 Before stimulation, the flow produced by the cilia is directed towards the posterior end, about  $11^\circ$  to  
344 the right (Fig. 5A, blue). This should produce a forward left spiraling movement, as documented from  
345 observations of free swimming (Jennings, 1904; Machemer, 1972). During a pulse that triggers an  
346 action potential, the flow is directed towards the anterior end, about  $9^\circ$  to the right (Fig. 5A, red). This  
347 would make the cell swim backward, also spiraling to the left. An example of this spiraling motion is  
348 shown on Fig. 5B. The oral groove faces the spiral axis (Bullington, 1930; Herbert S. Jennings, 1899),  
349 which means that the rotational velocity vector  $\omega$  is tilted from the main axis towards the oral side by  
350 an angle  $\theta$  (in the median plane; Fig. 5C). In freely swimming paramecia, we found that  $\theta \approx 13^\circ (\pm 6.4^\circ)$   
351 and the rotation speed  $\|\omega\|$  is about 1 cycle/s ( $1.03 \pm 0.2$  cycle/s) (see Methods, *Behavioral*  
352 *measurements and Behavioral analysis*).

353 How does *Paramecium* turn? A directional change can occur if the angle  $\theta$  changes. According to  
354 Jennings (1904),  $\theta$  increases during the avoiding reaction, in relation with stimulus strength (Fig. 5D).  
355 To understand the relationship between ciliary beating patterns and kinematic parameters, in  
356 particular  $\theta$ , we examine a spherical model of radius  $60 \mu\text{m}$  (Fig. 5E), for which we can use analytical  
357 formula relating forces and motion (see Methods, *Hydrodynamic model*). The fluid produces local  
358 forces opposite to the direction of ciliary beating, and the total force and torque map linearly to the  
359 translational velocity vector  $\mathbf{v}$  and the rotational velocity vector  $\omega$  in the cell coordinate system (Lauga  
360 and Powers, 2009).

361 At rest (low calcium concentration), cilia beat towards the rear, slightly to the right (Fig. 5E, first  
362 column), so that the fluid produces a force towards the front, slightly to the left. If the direction of  
363 ciliary beating is identical everywhere in spherical coordinates (that is, in terms of the cardinal  
364 directions North/South/East/West, Fig. 9), then the force field over the sphere is symmetrical with  
365 respect to the main axis. This makes both the total force and the total torque align with the main  
366 (antero-posterior) axis, and therefore  $\mathbf{v}$  and  $\omega$  are also aligned with that axis, that is,  $\theta = 0$ . The  
367 organism then moves forward, with a spinning movement around the axis. We adjust the force so that  
368 the velocity is  $500 \mu\text{m/s}$ , which makes the sphere spin at about 1.8 Hz. Upon stimulation, when calcium  
369 concentration is high, cilia revert and beat forward (Fig. 5E, second column), making the organism  
370 move backward.

371 Thus, the organism cannot turn unless there is some asymmetry in the ciliary beating pattern.  
372 Machemer (1969) and Párducz (1967) observed that during the turning phase, anterior and posterior  
373 cilia beat in different directions; Jennings (1904) observed that left and right anterior cilia beat in  
374 different directions, where “left” and “right” are relative to the oral groove. In Fig. 5E (third column),  
375 we examine what happens if cilia beat in a swirling pattern around the oral groove: the left anterior  
376 cilia beating backward, the right anterior cilia beating forward, and the posterior cilia beating to the  
377 right. This corresponds to what would happen near the calcium concentration threshold for global  
378 ciliary reversal, if cilia revert back first in the left anterior part, then in the posterior part, then in the  
379 right anterior part. The swirling pattern suggests that the cell is going to turn around an axis tilted  
380 from the main axis, in the plane separating the left and right sides, and this can be confirmed  
381 analytically. In this configuration, the sphere does not move along the main axis ( $v = 0$  mm/s), because  
382 the net force along that axis is null, but it turns along an axis tilted by  $\theta \approx 34^\circ$  from the main axis. The  
383 sphere also spins about 4 times faster ( $\omega/(2\pi) \approx 7.2$  Hz). It returns to moving forward when all cilia  
384 revert back (Fig. 5E, fourth column).

385 This pattern of ciliary reversal is suggested on Fig. 1C. However, given that the particle flow was  
386 measured on a plane  $\sim 30 \mu\text{m}$  above the cell, that the cell could take different shapes and that the  
387 position of the oral groove was often difficult to estimate, it was generally not possible to determine  
388 the precise pattern of ciliary reversal empirically. Nevertheless, it is possible to demonstrate that cilia  
389 revert asynchronously. We measured particle flow separately in two regions of the field, beyond the  
390 anterior end, and beyond the posterior end (Fig. 5F). This was only possible for 9 cells, where video  
391 quality was sufficient (see Methods, *Particle image velocimetry*). We measured the mean angle  $\alpha$  of the  
392 flow field during stimulation with current pulses between 1 nA and 5 nA; weak pulses were not  
393 included because particle density tended to be lower due to sedimentation (weak pulses were  
394 recorded after strong pulses).

395 Figure 5F shows in one cell that posterior cilia (bottom) revert back after anterior cilia (top). Thus,  
396 before stimulation, when calcium concentration is low, anterior and posterior cilia beat in the same  
397 direction. Beating direction is also spatially homogeneous during stimulation, when calcium  
398 concentration is high. However, after stimulation, anterior and posterior cilia beat in different  
399 directions for a short period. This was a reproducible finding across the 9 cells: the posterior side tends  
400 to revert back slightly later than the anterior side (Fig. 5G) ( $p = 7.10^{-17}$ , one-tailed Wilcoxon test), with  
401 a mean delay of 26 ms (s.d. 29 ms). This confirms Párducz' observations (Párducz, 1967), which were  
402 based on electron microscopy of cells fixed during the avoiding reaction.

403

#### 404 **Modeling the avoiding reaction**

405 We now use this analysis to connect the electrophysiological model with motion of the organism. As  
406 illustrated in Fig. 5C, we will assume that the translational velocity vector  $\mathbf{v}$  is aligned with the main  
407 axis, so that it is fully parameterized by the velocity  $v$ , and that the rotation vector  $\boldsymbol{\omega}$  lies in the plane  
408 of the oral groove, so that it is parameterized by its angle  $\theta$  relative to the main axis and the spinning  
409 speed  $\omega$ . We assume that all three kinematic parameters ( $v, \theta, \omega$ ) are functions of intraciliary calcium  
410 concentration  $[\text{Ca}^{2+}]$  (Fig. 6A-C) (See Methods, *Electromotor coupling*, equations (21-23)).

411 We model velocity as a Hill function of  $[\text{Ca}^{2+}]$ , with threshold equal to the reversal threshold  $K_{Ca}$  and  $n$   
412 = 2 sites, linearly scaled to match the maximum positive and negative velocities measured empirically  
413 (Fig. 6A; equation (21)). In freely swimming paramecia, we observed that the median velocity was 472  
414  $\mu\text{m/s}$  ( $521 \pm 285 \mu\text{m/s}$ ) for forward swimming and 370  $\mu\text{m/s}$  ( $411 \pm 200 \mu\text{m/s}$ ) for backward  
415 swimming. Thus, in the model, we simply set both forward and backward maximum velocity at  $v =$   
416  $\pm 500 \mu\text{m/s}$ . Figure 6A shows the resulting function for the cell shown in Fig. 4A-F.

417 We model both  $\theta$  and  $\omega$  as bell functions of  $[\text{Ca}^{2+}]$  (Fig. 6B, C; equations (22-23); see Methods,  
418 *Electromotor coupling*), peaking when  $[\text{Ca}^{2+}]$  is near the global ciliary reversal threshold  $K_{motor}$ , as  
419 suggested by our analysis of the spherical model (Fig. 5E). The minimum angle is taken from  
420 measurements of trajectories of freely swimming paramecia ( $\theta \approx 13^\circ$ ). For the maximum angle, we  
421 choose  $\theta = 90^\circ$  to account for the strongest avoiding reactions observed by Jennings (Fig. 5D),  
422 corresponding to a rotation normal to the main axis. The minimum spinning speed is based on  
423 measurements ( $\omega \approx 1 \text{ cycle/s}$ ), and the maximum spinning speed is set to 4 times the minimum, as in  
424 the spherical model (Fig. 5D).



425

426 **Figure 6.** Simulation of the avoiding reaction. *A*, Velocity  $v$  as a function of intraciliary calcium concentration  
 427  $[Ca^{2+}]$  in the model. *B*, Angle  $\theta$  of the rotation axis as a function of  $[Ca^{2+}]$  in the model. *C*, Spinning speed  $\omega$  as a  
 428 function of  $[Ca^{2+}]$  in the model. Angle and spinning speed increase at intermediate  $Ca^{2+}$  concentration, as  
 429 implied by the spherical model in Fig. 5E. *D*, Simulated model trajectory with three 2 ms current pulse  
 430 stimulations of increasing amplitude. Images are shown at 400 ms intervals. Without stimulation, the organism  
 431 swims in spiral. A very small stimulation deviates the trajectory. Stronger stimulations produce avoiding  
 432 reactions, with backward swimming and turning. *E*, Example of an observed *Paramecium* trajectory showing  
 433 a directional change without backward swimming (right), followed by a full avoiding reaction (left). Images

434 are shown at 400 ms intervals, starting on the right. F, Backward swimming duration and reorientation angle  
435 as a function of current amplitude for 2 ms pulses. Red and black curves show results for the same model but  
436 different initial positions of the oral groove, differing by a quarter of a cycle. G, Backward swimming duration  
437 and reorientation angle as a function of current pulse duration  $T$  with 100 pA amplitude. H, Reorientation  
438 angle vs. backward swimming duration in  $n = 1138$  spontaneous avoiding reactions of *Paramecium*, showing  
439 a positive correlation (linear regression  $r = 0.2$ ,  $p \approx 10^{-11}$ ). About 15% of data points are not represented (larger  
440 angle or duration).

441 In this way, we obtain a model in which all kinematic variables are coupled to the electrophysiological  
442 model. We can then calculate organism motion from these variables, and thereby simulate behavior in  
443 an environment (see Methods, *Kinematics*). In the following, the model of one particular cell is chosen  
444 for illustration, the same cell as in Fig. 4.

445 We first examine the trajectory of a model stimulated by 2 ms currents of varying amplitude (Fig. 6D)  
446 (see Methods, *Behavioral scenarios*). Without stimulation, the organism swims in a helicoidal path.  
447 With a small stimulation amplitude (0.3 nA), the organism changes direction without swimming  
448 backward. At larger amplitude (0.5 nA), the organism swims backward for a very short time then turns  
449 and swims forward. When the amplitude is increased (5 nA), backward swimming is more noticeable.  
450 Directional changes without backward swimming do occur in freely swimming paramecia, as  
451 illustrated on Fig. 6E: the organism first changes direction without swimming backward, then does an  
452 avoiding reaction.

453 In more detail (Fig. 6F, top), we observe that the cell swims backward when current intensity exceeds  
454 a threshold (here 372 pA), then backward swimming duration tends to increase with intensity. The  
455 reorientation angle following the stimulation changes continuously with stimulation strength, but in a  
456 complex way (Fig. 6F, bottom). In particular, small stimulations can trigger large turns without  
457 backward swimming. In addition, the directional change depends on the initial position of the oral  
458 groove: the red and black curves of Fig. 6F (bottom) correspond to the same cell but an oral groove  
459 position (spinning angle) differing by a quarter of a cycle.

460 The characteristics of the avoiding reaction also depend on stimulus duration (Fig. 6G). If the pulse  
461 amplitude is fixed ( $I = 0.1$  nA) and its duration is increased, then the duration of backward swimming  
462 increases (Fig. 6G, top), and reorientation angle tends to increase for large durations but is not  
463 monotonous near threshold (Fig. 6G, bottom).

464 When we examine spontaneous avoiding reactions of freely swimming paramecia, we find that both  
465 backward swimming duration and reorientation angle vary broadly ( $156 \pm 81$  ms and  $114 \pm 66^\circ$ ,  
466 respectively) (Fig. 6H), and there is a small although highly significant correlation (linear regression,  
467  $r = 0.2$ ,  $p = 10^{-11}$ ). Thus, backward swimming duration and reorientation angle are variable and not  
468 deterministically related.

469

## 470 **A closed-loop behavioral model of *Paramecium***

471 We now use the model to describe how the interaction between organism and environment gives rise  
472 to behavior (see Methods, *Behavioral scenarios*).



473

474 **Figure 7.** Interaction of a model Paramecium with a generic stimulus, modelled as a positive current  
 475 proportional to the cell area within the stimulus area. A, Trajectory of the model doing several avoiding  
 476 reactions against the stimulus. B, Membrane potential (top), stimulus current (middle) and intraciliary  
 477 calcium concentration (bottom) at the first contact. Contact occurs at the boundary with the shaded region.  
 478 Orange curves indicate backward swimming. Several weak avoiding reactions occur in succession. C,  
 479 Trajectory of the model where sensory transduction has a 50 ms activation/deactivation time constant. In red,  
 480 the stimulus is placed 300  $\mu\text{m}$  further away. D, Same as B, for the black trajectory in C. The stimulus current  
 481 lasts longer and peaks after the organism has started reacting, resulting in a stronger avoiding reaction.

482 First, we consider an organism swimming towards a generic object, which triggers a depolarizing  
 483 current when in contact with the membrane (for example a chemical substance, or hot water) (Fig. 7).  
 484 Thus, we simply consider that the stimulus current is proportional to the surface area in contact with  
 485 the stimulus (see *Methods, Sensory transduction*). In contrast with previous situations, the stimulus is  
 486 not pre-determined but depends on behavior. As Dewey pointed out (1896), “the motor response  
 487 determines the stimulus, just as truly as sensory stimulus determines the movement.”. When the organism  
 488 touches the object, a current is triggered, which depolarizes the membrane (Fig. 7A, 7B). As the cell  
 489 swims into the object, the current increases until an action potential is triggered. The cell then swims  
 490 backward, moves out from the object and the current stops. Thus, the sensory current is necessarily  
 491 small and short, because the organism withdraws as soon as the current reaches threshold. This results  
 492 in a small avoiding reaction, and the organism bumps again repetitively against the object until it  
 493 finally escapes (Movie 1).

494 Larger movements can be obtained if sensory transduction has slower kinetics (Figs. 7C, D and Movie  
 495 2). Here, the sensory current follows the stimulation with a time constant of 40 ms, modelled with first  
 496 order kinetics (to simplify, the spatial spread of channels is not modeled; equation (24)). In this case,

497 the sensory current keeps on increasing (slightly) after the organism has started swimming backward  
498 and it lasts longer. This results in a larger avoiding reaction.

499 Although the model is deterministic, the directional change can be described as pseudo-random. If the  
500 object is moved 300  $\mu\text{m}$  further (Fig. 7C), then the organism escapes with a larger angle. This is because  
501 the organism spins while swimming, so that its oral groove takes a different position when it touches  
502 the object.

503 We now consider that the object is a disk in a square environment (Fig. 8A and Movie 4). To avoid  
504 boundary effects, we consider that the environment has the topology of a torus (paramecia escaping  
505 to the left reappear to the right). To account for spontaneous avoiding reactions (occurring at a rate of  
506 about 0.2 Hz in our behavioral measurements), we added a noisy current to the membrane equation.  
507 The paramecia are modeled as in Figs. 7C and D, with slow transduction. Fig. 8A shows 100 trajectories  
508 starting from random positions and simulated for 20 s. The proportion of paramecia inside the disk  
509 decreases from 19 to 7%. Thus, the disk acts as a repelling stimulus. Occasionally, a paramecium gives  
510 an avoiding reaction against the boundary, makes a large turn and swims backward into the disk. In  
511 this case, it continues being stimulated and swims backward through the disk until it escapes. This  
512 peculiar behavior might be avoided if currents of opposite polarity were triggered when stimulating  
513 the rear, as is the case for thermal stimuli (Tominaga and Naitoh, 1992) and some chemical substances  
514 (Oami, 1996). Traces shown in Fig. 8A show the membrane potential  $V$ , the stimulus current  $I$  and the  
515 calcium concentration  $[\text{Ca}^{2+}]$  for the trajectory shown in red, where we can distinguish a number of  
516 spontaneous avoiding reactions and one avoiding reaction against the disk.

517 Next, we examine how an object can act as an attractive stimulus (Fig. 8B and Movie 5). This behavior  
518 can be obtained if the cell responds to a hyperpolarizing stimulus with adaptation, so that a  
519 depolarization is triggered when the stimulus stops. A simple model that exhibits this behavior is one  
520 where the stimulus triggers currents through two pathways with different kinetics: a hyperpolarizing  
521 current with fast kinetics, and a depolarizing current of equal magnitude with slow kinetics (equations  
522 (25-27)). In this way, a transient hyperpolarizing current is triggered when the stimulus switches on,  
523 and a transient depolarizing current is triggered when the stimulus switches off. This is shown on Fig.  
524 8B. The proportion of paramecia inside the disk increases with time (from 15 % to 45 % in 20 s). It can  
525 be seen that paramecia tend to aggregate inside the disk, mostly near the boundary. This is due to the  
526 small avoiding reactions but also to the curvature of the disk.



527

528 **Figure 8.** Closed-loop behavior of the Paramecium model. *A*, Top: trajectories of 100 models swimming for 20  
 529 s in a torus with a depolarizing circular stimulus, modelled as in Fig. 7C. The proportion of cells in the disk  
 530 quickly decays (below). Membrane potential, stimulus current, and intraciliary calcium concentration are  
 531 shown for the trajectory highlighted in red, which does an avoiding reaction against the disk after a number  
 532 of spontaneous avoiding reactions. *B*, 100 model trajectories with a circular stimulus triggering an adapting

533 *hyperpolarizing current. Organisms tend to make avoiding reactions on the inner boundary of the disk. The*  
534 *proportion of cells in the disk increases over time. The highlighted trajectory enters the disk around  $t = 5$  s with*  
535 *a large hyperpolarization, then displays several avoiding reactions against the boundary of the disk before*  
536 *exiting. C, *Paramecia* swimming in a linear stimulus gradient, modelled as in B. The position of 200 cells*  
537 *starting at position  $x = 5$  mm is displayed every 5 s. D, Collective behavior in model *paramecia* induced by*  
538 *breathing and chemosensitivity.  $CO_2$  produced by cells is displayed in shades of grey (normalized to the spatial*  
539 *peak), and diffusion is simulated.  $CO_2$  concentration represents an attracting stimulus modelled as in B and C.*

540 Using the same model, we then place the *paramecia* in a linear stimulus gradient (Fig. 8C); the  
541 environment is toric in the transversal dimension (up and down boundaries are glued). We place all  
542 *paramecia* at the same initial position, with random orientations. The population then rapidly ascends  
543 the gradient. This occurs because a depolarizing current is produced when the stimulus decreases,  
544 triggering an avoiding reaction. This behavior has been observed in *Paramecium* with thermal  
545 gradients (H. S. Jennings, 1906; Mendelssohn, 1895), and shares similarities with bacterial chemotaxis  
546 (Berg, 1975).

547 Finally, we show an example of collective behavior (Fig. 8D). *Paramecium* produces  $CO_2$  by breathing,  
548 which acidifies its medium, and it is attracted by weak acids (Dryl, 1973; Houten, 1978; H. S. Jennings,  
549 1899). As a result, it can form aggregates, for example around a source of food or at the bottom of a  
550 depression slide (H. S. Jennings, 1899). We simulate the production of  $CO_2$  by *paramecia* and its  
551 diffusion in the medium (a square with torus topology), together with sensitivity to  $CO_2$  modeled in  
552 the same way as in Fig. 8B and C.  $CO_2$  concentration is represented in Fig. 8D as grey shades, after  
553 normalization. In this simulation, *paramecia* progressively form aggregates.

554

## 555 **Discussion**

### 556 **Summary**

557 We have built an integrative model of *Paramecium* that combines electrophysiology and motility. The  
558 model is informed by previous experimental literature and constrained by specific electrophysiology  
559 and behavioral experiments. It models mainly the action potential and its coupling with kinematic  
560 parameters, which allows it to be simulated as a model of autonomous behavior in various  
561 environments.

562 The electrophysiological model was built by model fitting to current clamp data, with calcium-  
563 dependent properties indirectly constrained by ciliary reversal data. This method recovered  
564 properties of individual currents compatible with previous measurements obtained by different  
565 means. For example, the calcium threshold for ciliary reversal was estimated to be  $\sim 2$   $\mu M$ , the same  
566 order of magnitude as measured by varying extracellular calcium concentration in *Paramecium* with  
567 permeabilized membranes (Naitoh and Kaneko, 1972). This is notable since calcium was not measured  
568 but only inferred from electrophysiology (indirectly through the estimation of the calcium current by  
569 the fitting procedure). The fitting procedure also determined that the calcium-dependent  $K^+$  current is  
570 small during the action potential, as previously determined with voltage-clamp experiments (Oertel et  
571 al., 1977), but dominant after stimulation. The magnitude and time scale of calcium currents estimated  
572 by fitting were also compatible with voltage-clamp measurements (Oertel et al., 1977). Quantitative  
573 fitting allowed us to estimate additionally the calcium inactivation threshold ( $\sim 3$   $\mu M$ ) and the number  
574 of inactivation sites ( $\sim 4$ ).

575 By measuring ciliary induced flows during action potentials, we found that ciliary reversal is not  
576 synchronous across the cell, confirming previous observations obtained with electron microscopy

577 (Párducz, 1967). We showed with a simple hydrodynamic model that asynchronous ciliary reversal  
578 allows the organism to turn, namely if the order of ciliary reversal follows a swirling pattern around  
579 the oral groove. From these findings, we built a phenomenological model of the coupling between  
580 calcium concentration and the main kinetic parameters, constrained with behavioral measurements  
581 (speed, angle).

582 The integrated model shows helicoidal swimming with graded avoiding reactions, where backward  
583 duration swimming and reorientation angle increase with stimulus strength or duration. As observed  
584 in spontaneous behavior, the model can also slightly reorient without swimming backward.

585 Behavior of the autonomous model is more complex than stimulus-response experiments, because the  
586 relation between sensory stimulus and motor response is circular. In particular, we noticed that the  
587 interaction with an object (e.g. a chemical substance) critically depends on the properties of sensory  
588 transduction. For example, efficient avoidance of the object requires persistent stimulation, e.g. with  
589 slow sensory activation/deactivation. Furthermore, sensory adaptation to a hyperpolarizing stimulus  
590 makes the stimulus attractive. This can allow the model to follow a stimulus gradient. Finally, collective  
591 behavior can arise if organisms are sensitive to a substance that they produce. In summary, relatively  
592 complex behavior can be generated by the interaction of this simple “swimming neuron” with its  
593 environment.

594

## 595 **Limitations**

596 This work has many limitations. First, ionic currents were measured simultaneously rather than in  
597 isolation, although we could isolate  $I_{Kd}$  by deciliation. This was partly for technical reasons (one cannot  
598 measure  $I_{K(Ca)}$  while blocking the calcium current), and partly to ensure a global fit of the entire model  
599 to the action potential. Nonetheless, current overlap may cause difficulties for model fitting. For this  
600 reason, we strived to choose the simplest models that captured the phenomenology.

601 A second limitation is that calcium was not directly measured. Instead, it was indirectly constrained  
602 by several observed phenomena: calcium-dependent inactivation of  $I_{Ca}$ , calcium-dependent activation  
603 of  $I_{K(Ca)}$ , and ciliary reversal. Calcium imaging has been performed previously in *Paramecium* by  
604 pressure injection of a calcium indicator, in other contexts (Iwadate et al., 1997; Iwadate and  
605 Kikuyama, 2001; Klauke and Plattner, 1997). However, it is technically challenging to perform  
606 quantitative time-resolved measurements of ciliary calcium, because the cilia represent a small  
607 fraction of the total volume (2-3%) and beat at about 20 Hz.

608 Related to this limitation, our estimates of calcium-dependent parameters, for example the ciliary  
609 reversal threshold, depend on an estimate of the effective ciliary volume. Compared to our estimate,  
610 based on electron microscopy measurements, this effective volume may be reduced by crowding, or  
611 increased by fast buffering. Changing this parameter results in proportional changes in concentration  
612 parameters. However, the fact that the fitted ciliary reversal threshold is close to the threshold  
613 measured on permeabilized *Paramecium* suggests that our estimate (also used in (Oertel et al., 1977))  
614 was reasonable.

615 Another limitation is we did not measure ciliary beating directly, but rather its effect on the fluid. This  
616 was motivated by the fact that we were interested primarily in the movement induced by ciliary  
617 beating, as well as by technical reasons. In future work, high speed imaging of ciliary beating could be  
618 used to determine the spatial pattern of ciliary reversal with higher precision, although contractions  
619 of the cell may complicate the analysis.

620 Because of these technical limitations, our model of electromotor coupling was highly simplified,  
621 restricted to a phenomenological relation between calcium concentration and three kinetic  
622 parameters. It could also be that this relation is not instantaneous, involving more indirect pathways.

623 Finally, we considered only generic rather than biophysical models of sensory transduction, and we  
624 did not consider mechanical or hydrodynamic interactions with objects (Berke et al., 2008; Jana et al.,  
625 2015; Ohmura et al., 2018). More generally, the behavioral repertoire of *Paramecium* includes other  
626 aspects that we did not attempt to model, such as the escape reaction (Machemer, 1974; Roesle, 1903),  
627 contractions (Nakaoka and Machemer, 1990), trichocyst discharge (Hamel et al., 2011; Knoll et al.,  
628 1991) and gravitaxis (Jensen, 1893).

629

### 630 **How *Paramecium* turns**

631 Since our model directly couples calcium concentration to kinetic parameters, it is not tied to any  
632 specific hypothesis about the ciliary beating pattern. However, turning is only possible if ciliary  
633 reversal is asynchronous, leading to a strongly asymmetrical ciliary beating pattern, otherwise the  
634 action potential would only trigger a back-and-forth movement in the direction of the main axis. We  
635 have shown that one possibility, compatible with the observed movement, is that cilia beat in a swirling  
636 pattern around the oral groove.

637 It is known that there is some structural and molecular heterogeneity between cilia, in particular  
638 between locomotor and oral cilia (Aubusson-Fleury et al., 2015). Whereas basal bodies are regularly  
639 placed on the dorsal side, they are spatially arranged on the ventral side with a characteristic pattern  
640 around the oral groove. The beating frequency during helicoidal swimming is also spatially  
641 heterogeneous (Jung et al., 2014), and tail cilia are also known to be immobile (Machemer and  
642 Machemer-Röhnisch, 1984). Ciliary heterogeneity is likely to be more complex than a distinction  
643 between oral and locomotor cilia, because when *Paramecium* is cut in two pieces below the oral  
644 groove, both pieces can turn in a similar way (Jennings and Jamieson, 1902). Such heterogeneity is  
645 likely a general feature of motile microorganisms, some of which can exhibit complex gaits (Wan,  
646 2020).

647 Machemer (1969) and Párducz (1967) described an asynchrony between anterior and posterior  
648 ciliary reversal, with anterior cilia returning to their initial beating direction before posterior cilia,  
649 which we confirmed with our PIV measurements. However, this is not sufficient to produce turning: if  
650 both anterior and posterior beating patterns are axisymmetric, any combination of them would still  
651 produce movement along the main axis. Jennings mentions that there is also a reversal asynchrony  
652 between the anterior left and anterior right cilia, such that all anterior cilia transiently beat towards  
653 the oral groove during the avoiding reaction (Jennings, 1904). More detailed investigation is necessary  
654 to clarify this question.

655 Physiologically, asynchronous ciliary reversal can be due to differential calcium sensitivity, that is, the  
656 calcium threshold for reversal might vary across cilia. This is the implicit assumption of our model. It  
657 could also be that there are differences in calcium entry or removal across cilia (e.g. a gradient of  
658 calcium channel expression, or calcium pumps, or calcium buffering molecules). Some studies suggest  
659 that cyclic nucleotides may also differentially regulate the reversal threshold (Noguchi et al., 2000,  
660 1991).

661

### 662 **Previous models**

663 We are aware of two previous attempts to model *Paramecium*'s action potential, neither of which was  
664 based on quantitative measurements. Hook and Hildebrand (1979) used a calcium channel model with  
665 instantaneous transitions, an ohmic current-voltage relation (instead of GHK), an inactivation state  
666 accessible only from the closed state, and no voltage-dependent K<sup>+</sup> channel (only a model of I<sub>K(Ca)</sub>,  
667 which is not the major K<sup>+</sup> current). Kunita et al. (2014) used a Hodgkin-Huxley type model with  
668 voltage-dependent inactivation of calcium channels, which is not the main inactivation mode of this  
669 channel (Brehm et al., 1980), even though the phenomenon exists on a slow timescale (Hennessey and  
670 Kung, 1985). The model included two calcium channels (fast and slow), for which there is no  
671 electrophysiological support, and their relative activation was given as a function of time after stimulus  
672 start (i.e., it is not modeled). The calcium-dependent K<sup>+</sup> current was not included. Neither  
673 electrophysiological model was fitted to data, and neither was coupled to a kinematic model.

674

## 675 **Perspectives**

676 The model could be improved by addressing the technical limitations listed above. In particular, it  
677 would be most enlightening to measure calcium concentration in the cilia at high temporal and spatial  
678 resolution, although it might require new technical developments. Further investigations should be  
679 carried out to understand in detail how *Paramecium* turns: to measure the spatial pattern of ciliary  
680 responses and to determine how this heterogeneity is achieved physiologically.

681 We have addressed only the avoiding reaction of *Paramecium*. The modeling effort could be completed  
682 by addressing other behavioral aspects, such as the escape reaction (increased ciliary beating speed  
683 upon hyperpolarization), which involves distinct hyperpolarization-activated channels (Brette, 2021).  
684 *Paramecium* is sensitive to many sensory modalities, including temperature, various chemical  
685 substances, mechanical stimulation, light. Thus, the model should be completed by models of sensory  
686 transduction, as well as of mechanical interaction with objects. This would allow us to use the model  
687 to investigate the physiological basis of behavior of *Paramecium* in complex environments.

688 Finally, this work opens the perspective of addressing complex autonomous behavior in ecological  
689 environments, including adaptation, learning and problem solving (Brette, 2021), with a systemic  
690 modeling approach.

691

## 692 **Materials and Methods**

### 693 **Paramecium culture and preparation**

694 Cultures of *Paramecium tetraurelia* were obtained from Éric Meyer, Institut de Biologie, Ecole Normale  
695 Supérieure, Paris, France. For electrophysiological experiments (at Institut de la Vision), paramecia  
696 were co-cultured with *Klebsiella pneumoniae*, where each week 1 mL of culture was reinjected into 5  
697 mL of Wheat Grass Powder (WGP) buffer supplemented with 1 μL of beta-sitosterol. Cultures were  
698 kept at room temperature (about 20°C). Cells were harvested in the early stationary growth phase,  
699 between 3 and 5 days after feeding them. To wash and concentrate cells for experiments, a droplet of  
700 culture (approximately 600 μL) was placed in a narrow neck volumetric flask before adding  
701 extracellular solution used for electrophysiology (see below). Due to negative gravitaxis (Naitoh and  
702 Eckert, 1972), paramecia tend to accumulate at the top of the solution. Thus, after approximately 10  
703 min, a concentrated population of cells were retrieved from the top of the flask and placed in a

704 microcentrifuge tube for at least 3h for adaptation (Machemer-Röhnisch and Machemer, 1989; Oka et  
705 al., 1986). The tube was shaken before collecting cells to perform an experiment.

706 The culture method differed slightly for the behavioral measurements with freely swimming  
707 paramecia, because these cultures were done in another lab (Laboratoire Jean Perrin). Instead, before  
708 an experiment, bacteria were first grown in 5 mL of WGP for 24 h at 27°C, then paramecia were grown  
709 by adding 1 mL of *Paramecium* culture and 1 µL of beta-sitosterol to the bacterized WGP, for 48 h at  
710 27°C in the dark. About 0.4 mL of cell suspension were then pipetted from the top of the culture tube  
711 into 4 mL of extracellular solution (see *Electrophysiology*), at least 20 minutes before an experiment.

712

### 713 **Swimming pools**

714 Freely swimming paramecia were imaged at room temperature (~25°C) in square pools of side length  
715 30 mm and depth 340 µm. These were obtained using micromilling and molding techniques. A  
716 Plexiglas mold, consisting of a square trench, is first milled with a square end mill of diameter 1 mm  
717 using a CNC micro-milling machine (Minitex, Machinery Corp., USA). Then a liquid mixture of Poly-  
718 DiMethyl Siloxane (PDMS, Sylgard 184, Dow Corning, USA) and its crosslinker (10:1 mass ratio) is  
719 poured onto the Plexiglas mold. It is immediately placed in a vacuum chamber for at least 1 h to remove  
720 any air bubbles. Crosslinking of the mixture is then obtained by placing the whole in an oven at 65°C  
721 for at least 4 h. Finally, the resulting transparent elastomer pool is gently peeled off the mold and put  
722 on a microscope glass slide. Prior to any experiment, the pool is exposed to an oxygen plasma for about  
723 1 min to render the PDMS surface hydrophilic and prevent the trapping of air bubbles.

724

### 725 **Behavioral measurements**

726 For all behavioral experiments, about 500 µL of the cell suspension is pipetted into the pool with a  
727 concentration of 300 – 600 cells/mL. Trajectories are imaged at 50 Hz with a CMOS camera (Blackfly  
728 S BFS-U3-51S5M-C, Flir, USA, 2448x2048 pixels<sup>2</sup>, 10 bits), acquired with its dedicated acquisition  
729 software (Spinview, Flir, USA). A high magnification variable zoom lens (MVL12X12Z, Thorlabs) is  
730 used and yields a pixel size of 3.81 µm. The pool is uniformly illuminated with a dark field  
731 configuration, by placing ~10 cm beneath the pool a square LED panel (EFFI-SBL, Effilux, France), on  
732 top of which a fully opaque mask is positioned, partially covering the LED panel (typically ¼ of its  
733 surface). The LED panel produces a red light (wavelength  $\lambda = 625$  nm) to minimize phototaxis  
734 (Iwatsuki and Naitoh, 1983, 1982). Movies of the swimming paramecia are 200 s long (see Movie 7).

735 To limit hard drive space, images are stored without their background with lossless compression (TIFF  
736 format). The background image is computed by taking for each of its pixels the minimum pixel  
737 intensity over the first 100 frames. It is then subtracted from each frame, and pixels with an intensity  
738 value below a threshold (automatically computed with the “triangle method”, see e.g. (Zack et al.,  
739 1977)) are set to 0.

740 Trajectories are extracted with the open source tracking software FastTrack (Gallois and Candelier,  
741 2021), and manually inspected for corrections. Briefly, the software fits an ellipse to the cell's shape,  
742 and disambiguates front and rear based on the asymmetry of the pixel histogram along the main axis.  
743 Trajectories shorter than 1 s and sequences where the cell is immobile are discarded. Errors in  
744 front/rear identification are automatically corrected as follows: when the cell turns by more than 20°  
745 over two successive frames, it is considered an error and the angle is flipped.

746 Trajectories with circling motions are also discarded. To this end, we calculate the proportion of the  
747 trajectory where the cell turns clockwise versus anti-clockwise (for trajectories longer than 4 s). These  
748 proportions should be balanced (0.5) for helicoidal trajectories. The trajectory is eliminated if these  
749 proportions differ by more than 0.1 from the expectation, with manual confirmation. In total, there  
750 were  $n = 554$  selected trajectories.

751

## 752 **Behavioral analysis**

### 753 *Analysis of helicoidal trajectories*

754 We manually selected 20 trajectories presenting clear helicoidal motion in the focal plane from 2  
755 experiments, totaling 121 s. In each helicoidal trajectory, cell orientation  $\gamma(t)$  varies periodically with  
756 period  $T$ . We fitted  $\gamma(t)$  to a sinusoidal signal. We found  $T = 1.02 \pm 0.27$  s (mean  $\pm$  s.d.),  
757 corresponding to a spinning speed  $\omega = \frac{1}{T} = 1.03 \pm 0.2$  cycle/s or about  $2\pi/s$  in radians. The amplitude  
758 was  $\theta = 13 \pm 6.4^\circ$ , the angle relative to the spiral axis.

759

### 760 *Analysis of avoiding reactions*

761 An avoiding reaction is defined as a portion of trajectory during which the cell swims backward. This  
762 backward swimming is detected when the instantaneous motion vector  $\mathbf{m}$  and the orientation vector  
763  $\mathbf{o}$  (posterior to anterior) point to opposite directions, i.e.,  $\mathbf{m} \cdot \mathbf{o} < 0$ . Avoiding reactions consisting of a  
764 single pair of frames were discarded. The mean frequency of spontaneous avoiding reactions was  
765 calculated as the number of avoiding reactions across all trajectories, divided by the total duration,  
766 yielding 0.18 Hz.

767 Only reorientation events involved in planar avoiding reactions were selected, based on  
768 measurements of the eccentricity of the ellipse that best fits the shape of paramecia. Whenever this  
769 eccentricity went below 0.8, the event was discarded. The total reorientation angle was obtained by  
770 summing all successive instantaneous reorientation angles during the entire avoiding reaction.

771 In Fig. 6G, the 2D probability density of reorientation angle and backward duration was calculated with  
772 Gaussian kernel density estimation.

773

## 774 **Deciliation**

775 Deciliated cells were obtained by adding 96% ethanol to a tube containing the previously washed and  
776 adapted cells in the extracellular solution up to a final concentration of 5% (v/v) (Ogura, 1981). Then  
777 the tube was shaken for 2 min and left to rest for 1 min. Deciliated cells were collected from the lower  
778 half of the tube since they no longer accumulate at the top of the solution. Cilia start to grow back after  
779 approximately 30 min. Thus, as described in (Ogura, 1981), in some experiments we blocked cilia  
780 regrowth by adding 10 mM of colchicine to the extracellular solution.

781

## 782 **Electrophysiology**

783 The extracellular solution used in all experiments contains 1 mM CaCl<sub>2</sub>, 4 mM KCl and 1 mM Tris-HCl  
784 buffer with pH 7.2, except for Fig. 2B, where there was no KCl (blue curve). Microelectrodes of ~50 MΩ  
785 resistance were pulled using a micropipette puller (P-1000, Sutter Instrument) from standard wall  
786 borosilicate capillary glass with filament (o.d. 1 mm, i.d. 0.5 mm, Harvard Apparatus). They were filled  
787 with a 1 M KCl solution using a MicroFil non-metallic syringe needle (MF 34G-5, World Precision  
788 Instruments); a few recordings were done with 3 M KCl (no particular change was noticed).

789 We used an upright microscope (LNScope, Luigs & Newmann) with two objectives, a 20× air objective  
790 (SLMPLN Plan Achromat, Olympus) to locate cells, and a 40× water immersion objective (LUMPLFLN,  
791 Olympus) with DIC contrast enhancement for electrophysiology and imaging.

792 Paramecia were immobilized using the device described in (Kulkarni et al., 2020). Briefly, paramecia  
793 are immobilized against a transparent filter (Whatman Cyclopore polycarbonate membranes;  
794 diameter 25 mm, pore diameter 12 μm) thanks to a peristaltic pump (Gilson Minipulse 3) that  
795 circulates the fluid from below the filter to above the device. Two microelectrodes are then lowered  
796 into the cell, and the pump is stopped. The cell is then held in place by the electrodes.

797 Electrophysiology recordings were performed using an amplifier with capacitance neutralization  
798 (Axoclamp 2B and Axoclamp 900 A, Molecular Device) and an analog–digital acquisition board  
799 operating at a sampling frequency of 40 kHz (USB-6343, National Instruments). Custom Python  
800 programs (<https://github.com/romainbrette/clampy>) were used to control the acquisition board.

801 Membrane potential was recorded with the reading electrode while 100 ms current pulses of various  
802 amplitudes were injected through the second electrode, with at least 1 s between successive trials.

803

#### 804 **Particle image velocimetry**

805 To measure the flows induced by cilia beating, the bath was seeded with 1 μm silica or polystyrene  
806 particles (~0.2 mM) after paramecia were immobilized and the pump was stopped. Because of  
807 sedimentation, particle density was typically higher at the beginning of the experiment. Images were  
808 recorded at 30 Hz with a high-sensitivity CCD camera (Lumenera Infinity 3-6UR) over a 1392×1392  
809 pixels region of interest surrounding the cell (8 bits depth, pixel width 0.178 μm). Frames were  
810 synchronized with electrophysiology recordings using a digital trigger.

811 Frames were preprocessed by removing the background (average image) and band-pass filtering  
812 (subtraction of two Gaussian filters with standard deviation 1 μm and 1.3 μm). Consecutive frames  
813 were then analyzed with particle image velocimetry (PIV) using the OpenPIV Python package  
814 (<https://github.com/OpenPIV/openpiv-python.git>), which calculates the velocity field using image  
815 cross-correlation. We used 50 μm windows with 2/3 overlap.

816 In each frame, we calculated the mean angle of the velocity vector over the entire field, using circular  
817 mean (argument of the mean complex unit vector; occasional missed frames were discarded). We then  
818 subtracted the angle of the anteroposterior axis. The position of anterior and posterior ends was  
819 measured manually. As the two ends can be visually ambiguous, they were automatically corrected (by  
820 swapping) when the flow measured before stimulation was directed towards the anterior end  
821 (indicating backward swimming).

822 In Figure 5A, for each cell we averaged the mean angle over all currents and over the 300 ms before  
823 stimulus (blue) or over the second half of the stimulus (red), for positive currents (<5 nA).

824 We also calculated the mean angle in the anterior and posterior regions as indicated in Fig. 5F. Each  
825 region is a half-plane orthogonal to the main axis, starting at one end. For this analysis, we selected n

826 = 9 cells with high quality video recordings and clear cell positioning, indicated by an absence of missed  
827 frames and a pre-stimulus flow deviating by less than 45° from the main cell axis. The average was  
828 restricted to responses to large pulses (1 to 5 nA), because those were recorded before the small pulses  
829 and therefore had a higher density of particles (due to sedimentation).

830

## 831 **Electrophysiological modeling**

832 In this section, we describe the biophysical models. The parameter values are obtained by fitting the  
833 models to the data (section *Model fitting*).

834

### 835 ***Electrode model***

836 All recordings were done with two electrodes, an injecting electrode and a reading electrode. Because  
837 of the capacitance and resistance of the injecting electrode, the current injected in the cell is a low-pass  
838 filtered version of the command current (Brette et al., 2008). To estimate this current, we model the  
839 injecting electrode as a simple RC circuit and estimate its parameters  $R_e$  and  $\tau_e$  from responses to small  
840 pulses, assuming passive cell responses:

$$841 \quad C \frac{dV}{dt} = -g_L(V - V_0) + I_e \quad (1)$$

$$842 \quad \tau_e \frac{dV_2}{dt} = V - V_2 + R_e I + \Delta V \quad (2)$$

$$843 \quad I_e = \frac{V_2 - V - \Delta V}{R_e} \quad (3)$$

844 where  $V$  is the membrane potential, assumed identical to the potential of the reading electrode,  $V_2$  is  
845 the potential of the injecting electrode,  $I_e$  is the current injected in the cell, and  $\Delta V$  accounts for a  
846 difference in tip potentials. The membrane equation (first equation) is a rough linear model of the cell,  
847 but only parameters  $R_e$  and  $\tau_e$  are used subsequently, to estimate  $I_e$  from  $I$  according to the last two  
848 equations ( $\Delta V$  has no impact on  $I_e$  and therefore can then be discarded). In the 29 ciliated cells analyzed  
849 for passive properties, we found  $R_e = 121 \pm 8 \text{ M}\Omega$  and  $\tau_e = 1 \pm 0.9 \text{ ms}$ .

850

### 851 ***Ionic currents***

852 *Paramecium* electrophysiology is reviewed in (Eckert and Brehm, 1979) and updated in (Brette, 2021;  
853 Valentine and Van Houten, 2022). *Paramecium* in an isopotential cell (Eckert and Naitoh, 1970; Satow  
854 and Kung, 1979). Thus, we consider a single membrane equation:

$$855 \quad C \frac{dV}{dt} = I_L + I_{Kir} + I_{Kd} + I_{Ca} + I_{K(Ca)} + I$$

856 where  $C$  is membrane capacitance,  $I_L = g_L(E_L - V)$  is the leak current,  $I_{Kd}$  is the delayed rectifier  $K^+$   
857 current responsible for repolarization,  $I_{Ca}$  is the ciliary voltage-dependent  $Ca^{2+}$  current,  $I_{K(Ca)}$  is the  
858 calcium-activated  $K^+$  current,  $I_{Kir}$  is the inward rectifier  $K^+$  current and  $I$  is a stimulating current. We  
859 did not include a few other electrophysiologically identified currents that are less relevant for this  
860 study, namely:  $Na^+$  (Saimi, 1986; Saimi and Ling, 1990) and  $Mg^{2+}$  (Preston, 1998, 1990) currents (since

861 our extracellular solution does not contain these two ion species), and hyperpolarization-activated  
 862 calcium currents responsible for the escape reaction (Nakaoka and Iwatsuki, 1992; Preston et al.,  
 863 1992a, 1992b), which we did not model.

864 The inward rectifier current  $I_{Kir}$  is a  $K^+$  current activated by hyperpolarization, most strongly below  $E_K$   
 865 (Oertel et al., 1978). It is modeled as follows:

$$866 \quad I_{Kir} = g_{Kir} n_{Kir}^p (E_K - V) \quad (4)$$

$$867 \quad \tau_{Kir} \frac{dn_{Kir}}{dt} = \frac{1}{1 + \exp\left(\frac{V - V_{Kir}}{k_{Kir}}\right)} - n_{Kir} \quad (5)$$

868 where  $p = 1$  or  $2$  ( $p = 2$  in the final version). We made this simple modeling choice because this current  
 869 was only used as a way to infer the reversal potential  $E_K$ . In particular, we did not include inactivation  
 870 (Preston et al., 1990). We also tested a version of the model where the linear driving force ( $E_K - V$ ) is  
 871 replaced by the Goldman-Hodgkin-Katz expression (Hille, 2001), but it made no significant difference  
 872 in fitting results.

873 For the delayed rectifier current  $I_{Kd}$ , we tested several models of the type:

$$874 \quad I_{Kd} = g_{Kd} n^p (E_K - V) \quad (6)$$

$$875 \quad \tau_{Kd} \frac{dn}{dt} = n_\infty(V) - n \quad (7)$$

876 We tested two classes of models. The Hodgkin-Huxley model is:

$$877 \quad \alpha_n(V) = \frac{a_{Kd}}{\text{exprel}\left(\frac{V_{Kd} - V}{k_{Kd}^a}\right)} \quad (8)$$

$$878 \quad \beta_n(V) = b_{IK} \exp\left(\frac{V_{Kd} - V}{k_{Kd}^b}\right) \quad (9)$$

$$879 \quad n_\infty(V) = \frac{\alpha_n(V)}{\alpha_n(V) + \beta_n(V)} \quad (10)$$

$$880 \quad \tau_{Kd}(V) = \tau_{Kd}^{min} + \frac{1}{\alpha_n(V) + \beta_n(V)} \quad (11)$$

881 where

$$882 \quad \text{exprel}(x) = (e^x - 1)/x$$

883 For numerical stability (near  $x = 0$ ), we use this special function in the code rather than the explicit  
 884 expression.

885 The Boltzmann model is:

$$886 \quad n_\infty(V) = \frac{1}{1 + \exp\left(\frac{V_{Kd} - V}{k_{Kd}}\right)} \quad (12)$$

887 
$$\tau_{Kd}(V) = a_{Kd} + \frac{b_{Kd}}{\cosh\left(\frac{V - V_r^{Kd}}{k_t^{Kd}}\right)} \quad (13)$$

888 The voltage-gated calcium current  $I_{Ca}$  is a calcium-inactivated current located in the cilia (Brehm et al.,  
889 1980; Eckert and Brehm, 1979). The corresponding channels have been genetically identified; they are  
890 similar to the Cav1 mammalian family (L-type), with a putative calmodulin binding site (Lodh et al.,  
891 2016). We model it similarly to (Chad et al., 1984; Standen and Stanfield, 1982):

892 
$$I_{Ca} = g_{Ca} m^2 h f_{GHK}(V) \quad (14)$$

893 where  $m$  is the activation gating variable,  $h$  is the inactivation gating variable, and  $f_{GHK}(V)$  is the  
894 normalized current-voltage relation of the open channel, given by the Goldman-Hodgkin-Katz  
895 equation (Hille, 2001). In the Hodgkin-Huxley model, this relation is linear. However, with very  
896 different intracellular and extracellular calcium concentrations, a better model is the Goldman-  
897 Hodgkin-Katz equation. Resting intracellular concentration is about 50-200 nM (Iwadate, 2003;  
898 Klauke and Plattner, 1997), and rises to an estimated 20  $\mu$ M during an action potential (Oertel et al.,  
899 1977). In contrast, extracellular concentration is 1mM in our experiments. Thus, we neglect  
900 intracellular concentration, which yields:

901 
$$f_{GHK}(V) = \frac{1}{\exp\left(\frac{2FV}{RT}\right)}$$

902 where  $F$  is the Faraday constant,  $R$  is the gas constant, and  $T = 293$  K is temperature (20°C). Here,  
903 extracellular concentration has been lumped into  $g_{Ca}$ , which is now homogeneous to a current, while  
904  $f_{GHK}(V)$  is unitless and has no free parameter.

905 The activation gating variable is governed by:

906 
$$\tau_m \frac{dm}{dt} = \frac{1}{1 + \exp\left(\frac{V_{Ca} - V}{k_{Ca}}\right)} - m \quad (15)$$

907 while the inactivation gating variable is a Hill function of intraciliary calcium concentration  $[Ca^{2+}]$ :

908 
$$h([Ca^{2+}]) = \frac{1}{1 + \left(\frac{[Ca^{2+}]}{K_{Ca}}\right)^{n_{Ca}}} \quad (16)$$

909 This is similar to the model of (Standen and Stanfield, 1982), except that the number of sites  $n_{Ca}$  is  
910 allowed to be greater than 1, because we found that this was necessary to fit our data.

911 A calcium-activated  $K^+$  current has been identified by comparison with Pawn mutants lacking  
912 functional voltage-activated calcium currents (Satow and Kung, 1980). The current is largely reduced  
913 by EGTA. Genomic analysis indicates the presence of both BK and SK channels, with SK channels  
914 immunochemically identified in the cilia (Valentine et al., 2012; Yano et al., 2013). We model the  
915 current as follows, with activation as a Hill function of  $[Ca^{2+}]$ :

916 
$$I_{K(Ca)} = g_{K(Ca)} m([Ca^{2+}]) (E_K - V) \quad (17)$$

917 
$$m([Ca^{2+}]) = \frac{1}{1 + \left(\frac{K_{K(Ca)}}{[Ca^{2+}]}\right)^{n_{K(Ca)}}} \quad (18)$$

918

## 919 *Calcium dynamics*

920 Resting intracellular calcium concentration  $[Ca^{2+}]_0$  has been estimated between 50 and 200 nM  
921 (Iwadate, 2003; Klauke and Plattner, 1997). We chose  $[Ca^{2+}]_0 = 100$  nM. Calcium enters the cilia when  
922 calcium channels open. The concentration increase is spatially uniform along the cilium (Iwadate and  
923 Suzaki, 2004). It then decreases by three mechanisms: buffering, pumps, and diffusion. Buffering can  
924 occur with a variety of calcium-binding proteins, an important one being centrin, located in the  
925 infraciliary lattice, at the base of cilia (Plattner, 2015; Plattner and Klauke, 2001). Plasma membrane  
926 calcium pumps (PMCA) have been identified in the basal membrane with low affinity, around  $10^{-7}$  M  
927 (Wright and van Houten, 1990), and also in the cilia (Yano et al., 2015, 2013). Suppressing the ciliary  
928 PCMA by RNA interference prolongs backward swimming, which means that they are involved in the  
929 removal of calcium after an action potential. In principle, calcium can also diffuse to the basal cytosol.  
930 However, this has not been observed (Husser et al., 2004). This might be because of cilia volume  
931 compared to the cell, or because calcium is buffered at the base of cilia. Both phenomena can be  
932 modeled by diffusion to the cilium base, with fixed resting concentration at the boundary.

933 We lump these diverse mechanisms into two simple processes: a linear process, with rate proportional  
934 to  $([Ca^{2+}] - [Ca^{2+}]_0)$ , modelling diffusion and low-affinity buffers, and a high-affinity process operating  
935 near rest, with rate given by a Hill function of  $[Ca^{2+}]$ , modelling PCMA or high affinity buffers. This  
936 results in the following equation:

$$937 \quad \frac{d[Ca^{2+}]}{dt} = \frac{I_{Ca}}{2Fv_{cilia}} + \lambda([Ca^{2+}] - [Ca^{2+}]_0) - \frac{J}{1 + \frac{[Ca^{2+}]_0}{[Ca^{2+}]}} \quad (19)$$

938 where  $v$  is the volume of cilia and  $F$  is the Faraday constant. It can be seen that the role of the high-  
939 affinity process in this model is to counteract the calcium flow at rest, namely  $J = I_{rest}/Fv_{cilia}$ , while  
940 the low-affinity process independently tunes the rate of calcium removal after an action potential.

941 There are 3000 – 4000 cilia in *P. tetraurelia* (Aubusson-Fleury et al., 2015; Iftode et al., 1989; Nagel  
942 and Machemer, 2000), with the upper estimates likely including oral cilia. Each cilium is 10-12  $\mu\text{m}$  long  
943 (Eckert and Naitoh, 1970; Sedar and Porter, 1955). Each cilium is 270 nm wide but the fiber bundle is  
944 200 nm wide (Aubusson-Fleury et al., 2015). This yields a total volume between 950 and 2750  $\mu\text{m}^3$ .  
945 We used the previous estimate  $v_{cilia} = 1700 \mu\text{m}^3$  from (Oertel et al., 1977), which is compatible with  
946 these bounds, but the uncertainty is large. In addition, the effective volume might be smaller because  
947 of crowding, or larger because of fast buffering. In practice, an error in the estimation of ciliary volume  
948 will translate into an equivalent change in all calcium binding constants (as well as  $\lambda$  and  $J$ ). Binding  
949 constants and volume cannot be determined independently, because the (inverse) volume effectively  
950 acts as a unit for those constants.

951 For stability, the numerical implementation of calcium-dependent equations used equivalent versions  
952 written as a function of

$$953 \quad p_{Ca} \equiv \log \frac{[Ca^{2+}]}{[Ca^{2+}]_0}$$

954 where  $[Ca]_0 = 0.1 \mu\text{M}$  is the resting concentration. For example, inactivation is rewritten as:

$$955 \quad h([Ca^{2+}]) = \frac{1}{1 + \exp(n_{Ca}(p_{Ca} - p_{K_{Ca}}))}$$

956 This equivalent change of variables avoids numerical issues when  $[Ca^{2+}]$  approaches 0. The calcium  
 957 dynamics equation rewrites as follows:

$$958 \quad \frac{dp_{Ca}}{dt} = \frac{I_{Ca}}{2F[Ca^{2+}]_0 v_{cilia}} e^{-pCa} + \alpha(e^{-pCa} - 1) - \frac{J}{1 + e^{pCa}}$$

959

### 960 **Electromotor coupling**

961 Cilia reorient when intraciliary calcium concentration reaches about 1  $\mu$ M (Naitoh and Kaneko, 1972).  
 962 We model the ciliary angle as a Hill function of  $[Ca^{2+}]$ :

$$963 \quad \alpha = \alpha_0 + \frac{\Delta\alpha}{1 + \left(\frac{K_{motor}}{[Ca^{2+}]}\right)^{n_{motor}}} \quad (20)$$

964 where angles are relative to the anteroposterior direction ( $\alpha = 0$  when cilia beat to the rear), and  
 965  $K_{motor}$  is the reversal threshold.

966 Velocity is modeled as an affine transformation of a Hill function with coefficient  $n = 2$ , changing sign  
 967 at  $K_{motor}$ :

$$968 \quad v = -v_{max} + \frac{2v_{max}}{1 + \left(\frac{[Ca^{2+}]}{K_{motor}}\right)^2} \quad (21)$$

969 where  $v_{max} = 500 \mu\text{m/s}$  is maximum velocity (both backward and forward), according to our  
 970 measurements.

971 The angle  $\theta$  of the rotation axis and the spinning speed  $\omega$  are modeled as bell functions peaking at  
 972  $K_{motor}$ :

$$973 \quad \theta = \theta_{min} + 2 \frac{\theta_{max} - \theta_{min}}{\left(\frac{K_{motor}}{[Ca^{2+}]}\right)^2 + \left(\frac{[Ca^{2+}]}{K_{motor}}\right)^2} \quad (22)$$

$$974 \quad \omega = \omega_{min} + 2 \frac{\omega_{max} - \omega_{min}}{\left(\frac{K_{motor}}{[Ca^{2+}]}\right)^2 + \left(\frac{[Ca^{2+}]}{K_{motor}}\right)^2} \quad (23)$$

975 We set  $\theta_{min} = 13^\circ$  based on our measurements, and  $\theta_{max} = 90^\circ$ , to allow for planar rotations as  
 976 illustrated in Fig. 5D. We set  $\omega_{min} = 2\pi/s$  (1 cycle/s) based on our measurements and  $\omega_{max} = 8\pi/s$  (2  
 977 cycles/s), based on the doubling found in the spherical model (Fig. 5E). Thus, no extra free parameter  
 978 is introduced.

979

### 980 **Sensory transduction**

#### 981 *Instantaneous transduction*

982 In Fig. 7, 8A and 8B where a well-delimited object (half-plane or disc) acts as a stimulus, we first  
 983 calculate the proportion of the cell surface in contact with the object. To this end, cell shape is  
 984 determined by the formula proposed by (Zhang et al., 2015):

985 
$$y(x) = \frac{b}{2} \left( \sqrt{1 - 4 \frac{x^2}{a^2}} - \beta \sin \left( \frac{2\pi x}{a} \right) \right)$$

986 where  $x$  is the position along the major axis and  $y$  the position along the minor axis,  $a = 120 \mu\text{m}$  is cell  
987 length,  $b = 35 \mu\text{m}$  is cell width and  $\beta = 0.15$  is an asymmetry factor. We then simply calculate the  
988 intersection of cell and object shapes (as pixel images). The stimulus current is then  $I = I_0 p$ , where  $I_0$   
989 is maximum current and  $p$  is the fraction of the cell image within the object.

990

### 991 *Delayed transduction*

992 In Fig. 7B and 8A, we simply consider that the transduction current activates and deactivates with a  
993 time constant  $\tau_I$ :

994 
$$\tau_I \frac{dI}{dt} = I_0 p - I \quad (24)$$

995 This simple model corresponds to channels with finite opening and closing rates (namely, opening rate  
996  $\alpha = \tau_I s$  and closing rate  $\beta = \tau_I(1 - s)$ , where  $s$  is proportional to the stimulus  $I_0 p$ ) but does not take  
997 into account the spatial recruitment of channels.

998

### 999 *Adaptation*

1000 In Fig. 8B, C and 9, we consider that there are two pathways with opposite polarity, a fast pathway and  
1001 a slower pathway:

1002 
$$\tau_{\text{fast}} dI_{\text{fast}} = s - I_{\text{fast}} \quad (25)$$

1003 
$$\tau_{\text{slow}} dI_{\text{slow}} = s - I_{\text{slow}} \quad (26)$$

1004 
$$I = I_{\text{slow}} - I_{\text{fast}} \quad (27)$$

1005 where  $\tau_{\text{fast}} = 40 \text{ ms}$  and  $\tau_{\text{slow}} = 200 \text{ ms}$ . Thus, for a constant stimulus  $s$ , the stationary current is 0. In  
1006 Fig. 8B (disc stimulus), the stimulus is  $s = I_0 p$ . In Fig. 8C and 9, where the environment is spatially  
1007 continuous, the stimulus is simply the value at the center of the cell.

1008

### 1009 **Model optimization**

1010 Model parameters are estimated with the model fitting toolbox of the Brian simulator (Stimberg et al.,  
1011 2019; Teska et al., 2020) (<https://github.com/brian-team/brian2modelfitting>). Briefly, the software  
1012 performs least square optimization using a combination of global optimization algorithms (we used  
1013 differential evolution) and gradient descent, where the gradient is calculated symbolically from the  
1014 model equations. Optimization with multiple objectives is done by adding the errors associated to the  
1015 different objectives. Compiled code is automatically produced by code generation. Each fitting  
1016 procedure took up to a few hours, and fitting scripts were run in parallel on different cells, using a  
1017 small cluster of 3 PC with 8 cores each.

1018 After model fitting, cells were discarded if passive properties were abnormal, indicating a bad  
 1019 recording ( $C > 500$  pF or  $R < 30$  M $\Omega$  or  $R > 500$  M $\Omega$ ), or if  $E_K > E_L$  (which is biophysically impossible),  
 1020 indicating a fitting problem.

1021

### 1022 *Electrode fitting*

1023 First, for each cell we estimated electrode resistance  $R_e$  and time constant  $\tau_e$  from responses to small  
 1024 100 ms pulses, both hyperpolarizing and depolarizing ( $|I| < 0.5$  nA), using equations (1-3). The error  
 1025 criterion was the sum of quadratic errors on both electrode potentials, measured from 100 ms before  
 1026 to 100 ms after the pulse. The estimated parameters were then used in subsequent fits.

1027

### 1028 *Hyperpolarized fits*

1029 For Fig. 2, we fitted the models described above with  $I_L$  and  $I_{Kir}$ , (equations (4-5)), with least square  
 1030 minimization of the error on the reading electrode potential, taken from pulse start to 50 ms after the  
 1031 pulse. The stimuli were 100 ms pulses with amplitude between -4 and 0 nA in 300 pA increments.

1032 We fitted the model with  $p = 1$  and with  $p = 2$  for  $I_{Kir}$ . Using two gates ( $n^2$ ) gave better fits than using  
 1033 one ( $n = 40$ ; median error 2.3 vs. 2.6 mV;  $p = 8.10 \cdot 10^{-5}$ , one-tailed Wilcoxon test). We also fitted the  $n^2$   
 1034 model with the ohmic driving force replaced by a Goldman-Hodgkin-Katz model, but it did not yield  
 1035 any significant improvement ( $p = 0.27$ , two-tailed Wilcoxon test). Selection criteria (see above) were  
 1036 passed by  $n = 28$  cells. Statistics of fitted parameters are shown in Table 1.

1037

|                                     | Mean    | Median  | s.d.    | s.e.m. |
|-------------------------------------|---------|---------|---------|--------|
| <b>C</b> (pF)                       | 288.87  | 278.82  | 75.32   | 18.83  |
| <b>E<sub>K</sub></b> (mV)           | -48.27  | -47.92  | 9.54    | 2.38   |
| <b>E<sub>L</sub></b> (mV)           | -20.32  | -19.03  | 11.32   | 2.83   |
| <b>V<sub>Kir</sub></b> (mV)         | -130.27 | -120.75 | 35.36   | 8.84   |
| <b>g<sub>L</sub></b> (nS)           | 9.41    | 7.11    | 6.93    | 1.73   |
| <b>g<sub>Kir</sub></b> (nS)         | 1375.38 | 873.36  | 1206.00 | 301.50 |
| <b>k<sub>Kir</sub></b> (mV)         | 31.53   | 30.23   | 8.89    | 2.22   |
| <b><math>\tau_{Kir}</math></b> (ms) | 15.44   | 15.10   | 3.69    | 0.92   |
| <b>1/R</b> (nS)                     | 1.21    | 1.14    | 0.72    | 0.18   |
| <b>V<sub>0</sub></b> (mV)           | -24.56  | -22.51  | 10.64   | 2.66   |

1038 **Table 1.** Statistics of fitted parameters ( $n = 28$ ) for hyperpolarized responses (model with two gates).

1039

### 1040 *Deciliated fits*

1041 For Fig. 3, we fitted the models described above with  $I_L$  and  $I_{Kd}$ , with least square minimization of the  
 1042 error on the reading electrode potential, taken from pulse start to 50 ms after the pulse. The stimuli  
 1043 were 100 ms pulses with amplitude between 0 and 4 nA in 300 pA increments. Parameters  $E_K$  and  $C$   
 1044 were taken from the previous fit to hyperpolarized responses. To make sure the short onset is well  
 1045 captured, the time interval is split in two windows: the first 30 ms and the rest of the response, and

1046 each window is equally weighted (meaning that a data point in the first window contributes more than  
1047 a data point in the second window).

1048 We tested the Hodgkin-Huxley (HH) type model (equations (6-11)) and the Boltzmann model  
1049 (equations (6-7) and (12-13)). The two models performed similarly ( $n = 21$ ; median 1.78 mV vs. 1.69  
1050 mV;  $p = 0.59$ , two-tailed Wilcoxon test). The median number of gates was 1.13 in the HH model (1.1-  
1051 1.8, 25-75% interval) and 1.7 (1.3-2.7) in the Boltzmann model. In both models, the minimal time  
1052 constant was very small (median 0.1 vs. 0.6 ms). Therefore, we chose a model with 2 gates ( $n^2$ ) and a  
1053 nearly null minimal time constant (100  $\mu$ s for numerical reasons). A Boltzmann  $n^2$  model gave similar  
1054 results to a HH  $n^2$  model ( $p = 0.96$ , two-tailed Wilcoxon test) and had fewer parameters, while  
1055 performing similarly to the unconstrained model ( $p = 0.79$ , two-tailed Wilcoxon test). Therefore, we  
1056 chose the Boltzmann  $n^2$  model. Selection criteria (see above) were passed by  $n = 16$  cells. Statistics of  
1057 fitted parameters are shown in Table 2.

1058 Fitting results motivated us to further simplify the model by enforcing  $V_{Kd} = V_{\tau}$  and  $k_{\tau} = 2k_{Kd}$ . This  
1059 corresponds to a simple biophysical model where opening and closing rates are of the form  $e^{\pm V/k}$ . This  
1060 simplification slightly increases the fit error (1.82 vs. 1.8 mV;  $p = 0.009$ , two-tailed Wilcoxon test), but  
1061 has the advantage of reducing the parameter set to a single kinetic parameter, the maximum time  
1062 constant (median 3.2 ms).

1063

|                                                | <b>Mean</b> | <b>Median</b> | <b>s.d.</b> | <b>s.e.m.</b> |
|------------------------------------------------|-------------|---------------|-------------|---------------|
| <b>C</b> (pF)                                  | 158.59      | 145.61        | 48.76       | 12.19         |
| <b>E<sub>K</sub></b> (mV)                      | -53.83      | -56.38        | 12.35       | 3.09          |
| <b>E<sub>L</sub></b> (mV)                      | -19.68      | -18.33        | 6.48        | 1.62          |
| <b>V<sub>Kd</sub></b> (mV)                     | 29.77       | 21.31         | 22.86       | 5.71          |
| <b>V<sub><math>\tau_{Kd}</math></sub></b> (mV) | 26.32       | 23.09         | 48.37       | 12.09         |
| <b>b<sub>Kd</sub></b> (ms)                     | 9.21        | 4.40          | 12.69       | 3.17          |
| <b>g<sub>L</sub></b> (nS)                      | 10.62       | 9.72          | 5.73        | 1.43          |
| <b>g<sub>Kd</sub></b> (nS)                     | 1130.25     | 100.11        | 2656.07     | 664.02        |
| <b>k<sub>Kd</sub></b> (mV)                     | 8.96        | 6.61          | 6.29        | 1.57          |
| <b>k<sub><math>\tau_{Kd}</math></sub></b> (mV) | 13.54       | 11.74         | 8.08        | 2.02          |

1064 **Table 2.** Statistics of fitted parameters ( $n = 16$ ) for deciliated cells (Boltzmann model with two gates).

1065

### 1066 *Ciliated fits*

1067 For Fig. 4, we fitted the complete model to electrophysiological and ciliary responses to two sets of 100  
1068 ms pulses, a set of pulses between 0 and 5 nA in 300 pA increments, and a set of pulses between -100  
1069 and 500 pA in 25 pA increments. The complete model consisted of  $I_L$ , the simplified  $n^2$  Boltzmann  
1070 model of  $I_{Kd}$  with  $a_{Kd} = 0.1$  ms,  $V_{Kd} = V_{\tau}^{Kd}$  and  $k_{\tau}^{Kd} = 2k_{Kd}$  (equations (6-7) and (12-13)),  $I_{Ca}$   
1071 (equations (14-16)),  $I_{K(Ca)}$  (equations (17-18)), calcium dynamics (equation (19)) and electromotor  
1072 coupling (equation (20)).

1073 To deal with possible shifts in tip potential between the two sets, we aligned all traces to a resting  
1074 potential of -22 mV (the median resting potential), and  $E_K$  was fixed at -48 mV (the median estimated  
1075  $E_K$ ).

1076 The optimization error combined an error on the reading electrode potential, an error on the ciliary  
 1077 angle (mean angle of the PIV analysis), and an error on resting calcium concentration. For the voltage  
 1078 error, the response was divided in two equally weighted intervals: from pulse start to pulse end, and  
 1079 from pulse end to 500 ms after the end (to capture the post-stimulus hyperpolarization). The angle  
 1080 error was defined as the quadratic error on the corresponding unit vectors, which is equivalent to  $E_\alpha =$   
 1081  $\cos^2(\alpha - \hat{\alpha}) + \sin^2(\alpha - \hat{\alpha})$ , and applied on the interval from 100 ms before the pulse to 500 ms after  
 1082 it. Finally, we ensured that the resting  $[Ca^{2+}]$  was  $0.1 \mu M$  by inserting an error on  $[Ca^{2+}]$  on the interval  
 1083 from 100 ms before the pulse to the start of the pulse ( $E_{Ca} = ([Ca^{2+}] - 0.1 \mu M)^2$ ). This effectively  
 1084 ensures  $J = I_{rest}/Fv_{cilia}$ .

1085 Selection criteria (see above) were passed by  $n = 18$  cells. Statistics of fitted parameters are shown in  
 1086 Table 3.

1087

|                               | Mean    | Median | s.d.    | s.e.m.  |
|-------------------------------|---------|--------|---------|---------|
| <b>C (pF)</b>                 | 303.06  | 289.10 | 67.81   | 15.98   |
| <b>E<sub>L</sub> (mV)</b>     | -23.07  | -23.30 | 1.18    | 0.28    |
| <b>J (1/s)</b>                | 946.72  | 866.02 | 422.76  | 99.65   |
| <b>V<sub>Ca</sub> (mV)</b>    | 0.47    | -1.33  | 6.03    | 1.42    |
| <b>V<sub>Kd</sub> (mV)</b>    | 9.55    | 4.19   | 12.48   | 2.94    |
| <b>α (1/s)</b>                | 19.43   | 7.79   | 32.31   | 7.62    |
| <b>b<sub>Kd</sub> (ms)</b>    | 4.77    | 4.50   | 2.58    | 0.61    |
| <b>g<sub>Ca</sub> (nA)</b>    | 434.81  | 226.63 | 413.79  | 97.53   |
| <b>g<sub>K(Ca)</sub> (nS)</b> | 3919.39 | 216.51 | 6499.27 | 1531.89 |
| <b>g<sub>L</sub> (nS)</b>     | 10.38   | 9.52   | 4.78    | 1.13    |
| <b>g<sub>Kd</sub> (nS)</b>    | 821.80  | 114.76 | 1469.93 | 346.47  |
| <b>k<sub>Ca</sub> (mV)</b>    | 4.34    | 4.35   | 0.97    | 0.23    |
| <b>k<sub>Kd</sub> (mV)</b>    | 5.74    | 4.89   | 2.97    | 0.70    |
| <b>n<sub>Ca</sub></b>         | 4.41    | 4.25   | 1.66    | 0.39    |
| <b>n<sub>K(Ca)</sub></b>      | 3.53    | 2.94   | 2.35    | 0.55    |
| <b>n<sub>motor</sub></b>      | 7.37    | 7.02   | 5.70    | 1.34    |
| <b>pK<sub>Ca</sub></b>        | 3.60    | 3.61   | 0.40    | 0.10    |
| <b>pK<sub>K(Ca)</sub></b>     | 6.37    | 6.79   | 1.50    | 0.35    |
| <b>pK<sub>motor</sub></b>     | 2.64    | 3.14   | 1.87    | 0.44    |
| <b>τ<sub>m</sub> (ms)</b>     | 0.91    | 0.94   | 0.38    | 0.09    |

1088 **Table 3.** Statistics of fitted parameters ( $n = 16$ ) for depolarized ciliated cells.

1089

## 1090 Statistics

1091 Fitting results obtained with different models were compared using the Wilcoxon test. Statistics are  
 1092 given as mean  $\pm$  standard deviation. In box plots, the box shows the first and third quartile with the  
 1093 median value inside, and the whiskers are the minimum and maximum values excluding outliers,  
 1094 which are shown as diamonds and defined as those at a distance exceeding 1.5 times the interquartile  
 1095 range from the box.

1096

1097 **Hydrodynamic model**

1098 In Fig. 5E, we calculated the motion vectors from patterns of ciliary beating on a sphere of 60  $\mu\text{m}$   
 1099 radius. The velocity vector  $\mathbf{U}$  and the rotation vector  $\mathbf{\Omega}$  are given by:

1100 
$$\begin{pmatrix} \mathbf{U} \\ \mathbf{\Omega} \end{pmatrix} = \begin{pmatrix} \mathbf{M} & \mathbf{N} \\ \mathbf{N}^T & \mathbf{O} \end{pmatrix} \begin{pmatrix} \mathbf{F} \\ \mathbf{L} \end{pmatrix}$$

1101 where  $\mathbf{F}$  is the external force and  $\mathbf{L}$  is the external torque (Lauga and Powers, 2009). The matrix is  
 1102 called the *mobility* matrix. For a sphere of radius  $r$ , the mobility matrix is diagonal:

1103 
$$\mathbf{U} = (6\pi\eta r)^{-1}\mathbf{F}$$

1104 
$$\mathbf{\Omega} = (8\pi\eta r^3)^{-1}\mathbf{L}$$

1105 We consider that each patch of membrane is subjected to a force from the fluid, in the direction  
 1106 opposite to the ciliary beating direction, and we calculate the total force and torque for different ciliary  
 1107 beating patterns.

1108 We use spherical coordinates  $(\theta, \phi)$  (see Fig. 9), where  $\theta = 0$  corresponds to the North pole,  
 1109 considered as the anterior end, and  $\phi = 0$  is the meridian corresponding to the oral groove. Thus, a  
 1110 surface element is:

1111 
$$dS = r^2 \sin \theta d\theta d\phi$$

1112 The local force is tangent to the sphere and oriented with an angle  $\alpha$ , where  $\alpha = 0$  is the direction of  
 1113 the meridian, pointing South. Cartesian coordinates are chosen so that the  $x$  axis is dorso-ventral, the  
 1114  $y$  axis is oriented left to right, and the  $z$  axis is posterior to anterior (i.e., South to North pole).



1115

1116 **Figure 9.** Conventions on the spherical model, with spherical coordinates and a local force  $\mathbf{F}$  on the surface of  
 1117 the sphere.

1118 With these conventions, the local force expressed in Cartesian coordinates is:

$$1119 \quad \mathbf{F} = A \begin{bmatrix} \cos \theta \cos \alpha \cos \phi - \sin \alpha \sin \phi \\ \cos \theta \cos \alpha \sin \phi + \sin \alpha \cos \phi \\ -\sin \theta \cos \alpha(\theta, \phi) \end{bmatrix}$$

1120 where  $A$  is the amplitude of the force and  $\alpha$  is its angle (to obtain this result, start from the North  
1121 pole, rotate along the  $y$  axis by  $\theta$ , then rotate along the  $z$  axis by  $\alpha$ ). Therefore, the total force is:

$$1122 \quad \mathbf{F}_{tot} = r^2 \int_{-\pi}^{\pi} \int_0^{\pi} \mathbf{F}(\theta, \phi) \sin \theta \, d\theta d\phi$$

1123 The local torque is  $\boldsymbol{\tau} = \mathbf{r} \times \mathbf{F}$  where  $\mathbf{r}$  is a radius. In Cartesian coordinates, we obtain:

$$1124 \quad \boldsymbol{\tau} = rA \begin{bmatrix} -\cos \theta \sin \alpha \cos \phi - \cos \alpha \sin \phi \\ -\cos \theta \sin \alpha \sin \phi + \cos \alpha \cos \phi \\ \sin \theta \sin \alpha \end{bmatrix}$$

$$1125 \quad \boldsymbol{\tau}_{tot} = r^2 \int_{-\pi}^{\pi} \int_0^{\pi} \boldsymbol{\tau}(\theta, \phi) \sin \theta \, d\theta d\phi$$

1126 The reported velocity is  $v = \|\mathbf{U}\|$ , the angle of the rotation axis  $\theta_{\text{rotation}}$  is calculated in the  $xz$  plane, and  
1127 the spinning speed is  $\omega = \frac{\|\boldsymbol{\Omega}\|}{2\pi}$  in cycle/s. Local force amplitude is identical in all ciliary beating patterns,  
1128 and chosen so as to obtain a forward velocity of 500  $\mu\text{m/s}$ .

1129 Three different patterns are represented in Fig. 5E. In the forward pattern, the local angle is uniform:  
1130  $\alpha = -170^\circ$ , corresponding to a beating direction of  $10^\circ$ , downward to the right. In the backward pattern,  
1131 the local angle is  $\alpha = -10^\circ$ , corresponding to a beating direction of  $170^\circ$ , upward to the right (obtained  
1132 by up/down symmetry). In both cases, the local force is axisymmetrical with respect to the  
1133 anteroposterior axis. It follows that both  $\mathbf{F}_{tot}$  and  $\boldsymbol{\tau}_{tot}$  are aligned with the  $z$  axis (anteroposterior).  
1134 This can be seen in the formulas above by integrating with respect to  $\phi$ , which yields 0 for the  $x$  and  $y$   
1135 coordinates.

1136 In the turning pattern, the left anterior quarter ( $\phi \in [-\pi, 0]$ ,  $\theta \in [0, \frac{\pi}{2}]$ ) follows the forward pattern  
1137 ( $\alpha = -170^\circ$ ), while the right anterior quarter ( $\phi \in [0, \pi]$ ,  $\theta \in [0, \frac{\pi}{2}]$ ) follows the backward pattern ( $\alpha =$   
1138  $-10^\circ$ ) and the posterior half ( $\theta \in [\pi/2, \pi]$ ) has local forces pointing to the left ( $\alpha = -90^\circ$ ), meaning cilia  
1139 beating to the right. The posterior half generates a rotating pattern around the main axis (by  
1140 axisymmetry), without translational movement. Each anterior quarter generates forces and torques

$$1141 \quad \mathbf{F}_{tot} = \begin{bmatrix} 2 \sin \alpha \\ -\cos \alpha \\ \frac{\pi}{4} \cos \alpha \end{bmatrix}$$

$$1142 \quad \boldsymbol{\tau}_{tot} = r \begin{bmatrix} 2 \cos \alpha \\ \sin \alpha \\ \frac{\pi}{4} \sin \alpha \end{bmatrix}$$

1143 With  $\alpha_L = \pi - \alpha_R$ , we then find that the  $y$  and  $z$  components of the total torque vanish. Added to the  
1144 torque generated by the posterior part, we obtain a torque vector in the  $xz$  plane, which is the plane of  
1145 the oral groove, separating the cell in left and right parts.

1146

## 1147 Kinematics

1148 We consider that the organism is an object moving by rigid motion. The organism is characterized by  
1149 a position vector  $\mathbf{x}$ , and an orientation matrix  $\mathbf{R}$  defining the rotation of the reference frame (frame of  
1150 the organism), so that a point  $\mathbf{y}$  on the reference frame is mapped to  $\mathbf{R}\mathbf{y}$  in the observer frame. The  
1151 reference frame is chosen as in the spherical model above, so that  $z>0$  points towards the anterior end  
1152 while the  $x$  axis the dorsoventral axis.

1153 Translational velocity is assumed to be in the posterior-anterior direction only:  $\mathbf{v} = [0, 0, v]$ , so that

$$1154 \quad \dot{\mathbf{x}} = \mathbf{R}\mathbf{v}$$

1155 Let  $\boldsymbol{\omega}$  be the rotation vector in the reference frame. We assume it is tilted from the main axis by an  
1156 angle  $\theta$  in the  $xz$  plane:

$$1157 \quad \boldsymbol{\omega} = -\omega[\sin(\theta), 0, \cos(\theta)]$$

1158 Over a time  $dt$ , the organism rotates by  $\boldsymbol{\Omega}(dt) = \mathbf{I} + [\boldsymbol{\omega}] \cdot dt$ , where

$$1159 \quad [\boldsymbol{\omega}] = \begin{bmatrix} 0 & -\cos(\theta) & 0 \\ \cos(\theta) & 0 & -\sin(\theta) \\ 0 & \sin(\theta) & 0 \end{bmatrix}$$

1160 is the infinitesimal rotation matrix, such that  $[\boldsymbol{\omega}]\mathbf{y} = \boldsymbol{\omega} \times \mathbf{y}$ . Therefore, the orientation matrix  
1161 changes as  $\mathbf{R}(t + dt) = \mathbf{R}\boldsymbol{\Omega}(dt)$ , giving:

$$1162 \quad \dot{\mathbf{R}} = \mathbf{R}[\boldsymbol{\omega}]$$

1163 For numerical reasons, we use quaternions instead of matrices (Graf, 2008), implemented with the  
1164 Python packages *quaternion* and *pyquaternion*. Orientation is then represented by a unit quaternion  $q$ ,  
1165 and kinematic equations translate to:

$$1166 \quad \dot{\hat{\mathbf{x}}} = q\hat{\mathbf{v}}\bar{q}$$

1167 where  $\hat{\mathbf{v}}$  is the pure quaternion with imaginary part  $\mathbf{v}$ , and

$$1168 \quad \dot{q} = \frac{1}{2}q\hat{\boldsymbol{\omega}}$$

1169

1170 *Confinement to a plane*

1171 We constrain the organism to move in a plane. This is done simply by rotating the orientation vector  
1172 at each time step so that it lies in the plane. Concretely, we calculate the orientation vector in the  
1173 observer frame:

$$1174 \quad \hat{\mathbf{p}} = q(0,0,1)\bar{q}$$

1175 Then we rotate the orientation vector around the axis  $\mathbf{u}$  that is orthogonal to both the  $z$  axis and  $\mathbf{p}$ :  
1176  $\mathbf{u} = (0,0,1) \times \mathbf{p}$ , by an angle  $\theta = \sin^{-1}(\mathbf{p}_z/\|\mathbf{p}\|)$ . The final orientation quaternion is then  
1177  $q' = Q(\mathbf{u}, \theta)q$ , where  $Q(\mathbf{u}, \theta)$  is the rotation of axis  $\mathbf{u}$  and angle  $\theta$ .

1178

## 1179 Behavioral scenarios

1180 In all simulations, the electrophysiological model fitted to the cell shown in Fig. 4 is integrated with  
1181 Euler method and a time step of 0.1 ms, using Brian 2 (Stimberg et al., 2019). Kinematics were  
1182 integrated with a time step of 1 ms for simulations with stimuli with sharp boundaries (Figs. 6, 7, 8A  
1183 and 8B) and 2 ms for simulations with spatially continuous stimuli (Figs. 8C and 8D).

1184

### 1185 *Avoiding reaction*

1186 In Fig. 6D, models are simulated in a plane with 2 ms pulse currents of amplitude 0.3, 0.5 and 5 nA, at  
1187 1 second intervals. In Fig. 6F, the stimulus is a 2 ms current pulse of 0.01 to 10 nA amplitude. In Fig.  
1188 6G, the stimulus is a 100 pA pulse of duration 0 to 100 ms. The reorientation angle is calculated as the  
1189 change in angle before and after the stimulus, averaged over 1 second (the spinning period).

1190

### 1191 *Interaction with a stimulus*

1192 In Fig. 7 and all subsequent figures, trajectories are constrained to a plane. In Fig. 7A and B, the stimulus  
1193 is a half-plane. It produces an instantaneous depolarizing current, proportional to the fraction of the  
1194 cell shape inside the stimulus (see *Sensory transduction*), with maximum 5 nA. In Fig. 7C and D, the  
1195 stimulus additionally goes through a low-pass filter with time constant 40 ms, representing the  
1196 activation/deactivation rate of the receptors.

1197

### 1198 *Repelling and attracting discs*

1199 In Fig. 8A and 8B, the stimulus is a disc of radius 1 mm within a 4 mm torus. 100 trajectories are  
1200 simulated for 20 s, with random initial positions. A noisy current is added to the membrane equation  
1201 so as to produce spontaneous action potentials at the observed rate of 0.2 Hz. It is modeled as an  
1202 Ornstein-Uhlenbeck process:

1203 
$$\tau_n \frac{dI_n}{dt} = -I_n + \sigma_n \sqrt{\tau_n} \xi$$

1204 with  $\tau_n = 20$  ms and  $\sigma_n = 9$  pA. Physiologically, this corresponds to the random opening of K<sup>+</sup>  
1205 channels (Moolenaar et al., 1976). This noise is included in all subsequent simulations.

1206 In Fig. 8A, the stimulus produces a depolarizing current with a 40 ms time constant, as in Fig. 7C and  
1207 D. In Fig. 8B, the stimulus produces an adapting hyperpolarizing current (see *Sensory transduction*;  
1208  $\tau_{\text{fast}} = 40$  ms and  $\tau_{\text{slow}} = 200$  ms), with a maximum amplitude of 1 nA.

1209

### 1210 *Gradient following*

1211 In Fig. 8C, the environment has the topology of a cylindrical surface, i.e., circular in the small dimension  
1212 (500  $\mu\text{m}$ ) and linear in the long dimension (25 mm). The stimulus is a linear gradient of 100 pA/mm,  
1213 with transduction modeled with adaptation as for the attracting disc (Fig. 8B).

1214

1215 *Collective behavior*

1216 In Fig. 8D, cells produce CO<sub>2</sub> by breathing, which then diffuses and acidifies the fluid. This is modelled  
1217 by the diffusion equation:

1218 
$$\frac{\partial S}{\partial t} = \alpha \cdot 1_{(x,y) \in \text{cell}} + D\Delta S$$

1219 where  $S$  is the stimulus (homogeneous to a current),  $\alpha$  is the production rate and  $D$  is the diffusion  
1220 coefficient of CO<sub>2</sub>. In water at 25°C,  $D \approx 0.002$  mm<sup>2</sup>/s but we accelerate it by a factor 5 to speed up the  
1221 simulation. The production rate is  $\alpha = 100$  pA/s in a square pixel of width 20 μm.

1222

## 1223 **Code and data availability**

1224 Code for electrophysiology experiments, model fitting and figures can be found at  
1225 <https://github.com/romainbrette/Paramecium-model>. Electrophysiology data and analyses,  
1226 including particle image velocimetry can be found at <https://doi.org/10.5281/zenodo.6074166>.  
1227 Behavioral data and code can be found at <https://doi.org/10.5281/zenodo.6074480>.

1228

## 1229 **Acknowledgments**

1230 We thank Marcel Stimberg for technical assistance and Eric Meyer for providing us with specimens of  
1231 *P. tetraurelia*.

1232 This work was supported by Agence Nationale de la Recherche (ANR-20-CE30-0025-01 and ANR-21-  
1233 CE16-0013-02), Programme Investissements d’Avenir IHU FOReSIGHT (Grant ANR-18-IAHU-01),  
1234 Fondation Pour l’Audition Grant FPA RD-2017-2, CNRS (Défi Mécanobiologie, project PERCEE), and  
1235 Sorbonne Université (Emergence, project NEUROSWIM).

1236

## 1237 **Competing interests**

1238 The authors have no competing interests to declare.

1239

## 1240 **References**

1241 Aubusson-Fleury A, Cohen J, Lemullois M. 2015. Ciliary heterogeneity within a single cell: the Paramecium  
1242 model. *Methods Cell Biol* **127**:457–485. doi:10.1016/bs.mcb.2014.12.007

1243 Berg HC. 1975. Bacterial behaviour. *Nature* **254**:389–392. doi:10.1038/254389a0

1244 Berke AP, Turner L, Berg HC, Lauga E. 2008. Hydrodynamic attraction of swimming microorganisms by  
1245 surfaces. *Phys Rev Lett* **101**:038102. doi:10.1103/PhysRevLett.101.038102

1246 Brehm P, Eckert R, Tillotson D. 1980. Calcium-mediated inactivation of calcium current in Paramecium. *J*  
1247 *Physiol* **306**:193–203.

1248 Brette R. 2021. Integrative Neuroscience of Paramecium, a “Swimming Neuron.” *eNeuro* **8**:ENEURO.0018-

- 1249 21.2021. doi:10.1523/ENEURO.0018-21.2021
- 1250 Brette R, Piwkowska Z, Monier C, Rudolph-Lilith M, Fournier J, Levy M, Frégnac Y, Bal T, Destexhe A. 2008.  
1251 High-resolution intracellular recordings using a real-time computational model of the electrode. *Neuron*  
1252 **59**:379–91. doi:S0896-6273(08)00539-4
- 1253 Bullington WE. 1930. A further study of spiraling in the ciliate Paramecium, with a note on morphology  
1254 and taxonomy. *J Exp Zool* **56**:423–449. doi:10.1002/jez.1400560404
- 1255 Chad J, Eckert R, Ewald D. 1984. Kinetics of calcium-dependent inactivation of calcium current in voltage-  
1256 clamped neurones of *Aplysia californica*. *J Physiol* **347**:279–300.
- 1257 Cohen N, Denham JE. 2019. Whole animal modeling: piecing together nematode locomotion. *Curr Opin Syst*  
1258 *Biol*, • Systems biology of model organisms • Systems ecology and evolution **13**:150–160.  
1259 doi:10.1016/j.coisb.2018.12.002
- 1260 Cohen N, Sanders T. 2014. Nematode locomotion: dissecting the neuronal–environmental loop. *Curr Opin*  
1261 *Neurobiol*, Theoretical and computational neuroscience **25**:99–106. doi:10.1016/j.conb.2013.12.003
- 1262 Drescher K, Goldstein RE, Michel N, Polin M, Tuval I. 2010. Direct Measurement of the Flow Field around  
1263 Swimming Microorganisms. *Phys Rev Lett* **105**:168101. doi:10.1103/PhysRevLett.105.168101
- 1264 Dryl S. 1973. Chemotaxis in Ciliate Protozoa Behaviour of Micro-Organisms. Springer US. pp. 16–30.  
1265 doi:10.1007/978-1-4684-1962-7\_2
- 1266 Dupre C, Yuste R. 2017. Non-overlapping Neural Networks in *Hydra vulgaris*. *Curr Biol* **27**:1085–1097.  
1267 doi:10.1016/j.cub.2017.02.049
- 1268 Eckert R. 1972. Bioelectric Control of Ciliary Activity. *Science* **176**:473–481.  
1269 doi:10.1126/science.176.4034.473
- 1270 Eckert R, Brehm P. 1979. Ionic mechanisms of excitation in Paramecium. *Annu Rev Biophys Bioeng* **8**:353–  
1271 383. doi:10.1146/annurev.bb.08.060179.002033
- 1272 Eckert R, Chad JE. 1984. Inactivation of Ca channels. *Prog Biophys Mol Biol* **44**:215–267.  
1273 doi:10.1016/0079-6107(84)90009-9
- 1274 Eckert R, Naitoh Y. 1970. Passive electrical properties of Paramecium and problems of ciliary  
1275 coordination. *J Gen Physiol* **55**:467–483.
- 1276 Gallois B, Candelier R. 2021. FastTrack: An open-source software for tracking varying numbers of  
1277 deformable objects. *PLoS Comput Biol* **17**:e1008697. doi:10.1371/journal.pcbi.1008697
- 1278 Graf B. 2008. Quaternions and dynamics. *ArXiv08112889 Math-Ph*.
- 1279 Hamel A, Fisch C, Combettes L, Dupuis-Williams P, Baroud CN. 2011. Transitions between three swimming  
1280 gaits in Paramecium escape. *Proc Natl Acad Sci U S A* **108**:7290–7295. doi:10.1073/pnas.1016687108
- 1281 Hansma HG. 1974. Biochemical studies on the behavioral mutants of *Paramecium aurelia*: ion fluxes and  
1282 ciliary membrane proteins (PhD Thesis). University of California, Santa Barbara.
- 1283 Hennessey TM, Kung C. 1985. Slow inactivation of the calcium current of Paramecium is dependent on  
1284 voltage and not internal calcium. *J Physiol* **365**:165–179. doi:10.1113/jphysiol.1985.sp015765
- 1285 Hennessey TM, Kung C. 1984. An anticalmodulin drug, W-7, inhibits the voltage-dependent calcium  
1286 current in *Paramecium caudatum*. *J Exp Biol* **110**:169–181.

- 1287 Hennessey TM, Rucker WB, McDiarmid CG. 1979. Classical conditioning in paramecia. *Anim Learn Behav*  
1288 **7**:417–423. doi:10.3758/BF03209695
- 1289 Hille B. 2001. *Ion Channels of Excitable Membranes*. Sinauer Associates.
- 1290 Höfer GF, Hohenthanner K, Baumgartner W, Groschner K, Klugbauer N, Hofmann F, Romanin C. 1997.  
1291 Intracellular Ca<sup>2+</sup> inactivates L-type Ca<sup>2+</sup> channels with a Hill coefficient of approximately 1 and an  
1292 inhibition constant of approximately 4 microM by reducing channel's open probability. *Biophys J*  
1293 **73**:1857–1865. doi:10.1016/S0006-3495(97)78216-X
- 1294 Hook C, Hildebrand E. 1979. Excitation of paramecium. *J Math Biol* **8**:197–214. doi:10.1007/BF00279722
- 1295 Houten JV. 1978. Two mechanisms of chemotaxis in Paramecium. *J Comp Physiol* **127**:167–174.  
1296 doi:10.1007/BF01352301
- 1297 Husser MR, Hardt M, Blanchard M-P, Hentschel J, Klauke N, Plattner H. 2004. One-way calcium spill-over  
1298 during signal transduction in Paramecium cells: from the cell cortex into cilia, but not in the reverse  
1299 direction. *Cell Calcium* **36**:349–358. doi:10.1016/j.ceca.2004.02.003
- 1300 Iftode F, Cohen J, Ruiz F, Rueda AT, Chen-Shan L, Adoutte A, Beisson J. 1989. Development of surface  
1301 pattern during division in Paramecium. I. Mapping of duplication and reorganization of cortical  
1302 cytoskeletal structures in the wild type. *Development* **105**:191–211.
- 1303 Iwadate Y. 2003. Photolysis of caged calcium in cilia induces ciliary reversal in Paramecium caudatum. *J*  
1304 *Exp Biol* **206**:1163–1170. doi:10.1242/jeb.00219
- 1305 Iwadate Y, Katoh K, Asai H, Kikuyama M. 1997. Simultaneous recording of cytosolic Ca<sup>2+</sup> levels  
1306 in Didinium and Paramecium during a Didinium attack on Paramecium. *Protoplasma* **200**:117–127.  
1307 doi:10.1007/BF01283288
- 1308 Iwadate Y, Kikuyama M. 2001. Contribution of Calcium Influx on Trichocyst Discharge in Paramecium  
1309 caudatum. *Zoolog Sci* **18**:497–504. doi:10.2108/zsj.18.497
- 1310 Iwadate Y, Suzaki T. 2004. Ciliary reorientation is evoked by a rise in calcium level over the entire cilium.  
1311 *Cell Motil* **57**:197–206. doi:10.1002/cm.10165
- 1312 Iwatsuki K, Naitoh Y. 1983. Photobehavior in a Colorless Paramecium. *BioScience* **33**:714–715.  
1313 doi:10.2307/1309353
- 1314 Iwatsuki K, Naitoh Y. 1982. Photoresponses in colorless Paramecium. *Experientia* **38**:1453–1454.  
1315 doi:10.1007/BF01955765
- 1316 Jana S, Eddins A, Spoon C, Jung S. 2015. Somersault of Paramecium in extremely confined environments.  
1317 *Sci Rep* **5**. doi:10.1038/srep13148
- 1318 Jennings. 1906. *Behavior of the lower organisms*. New York, The Columbia university press, The  
1319 Macmillan company, agents; [etc., etc.].
- 1320 Jennings HS. 1906. *Behavior of the lower organisms*. New York, The Columbia university press, The  
1321 Macmillan company, agents; [etc., etc.].
- 1322 Jennings HS. 1904. The behavior of paramecium. Additional features and general relations. *J Comp Neurol*  
1323 *Psychol* **14**:441–510. doi:10.1002/cne.920140602
- 1324 Jennings Herbert S. 1899. Studies on reactions to stimuli in unicellular organisms. ii.—the mechanism of  
1325 the motor reactions of paramecium. *Am J Physiol-Leg Content* **2**:311–341.

- 1326 doi:10.1152/ajplegacy.1899.2.4.311
- 1327 Jennings H. S. 1899. Studies on reactions to stimuli in unicellular organisms. iv.—laws of chemotaxis in  
1328 paramecium. *Am J Physiol-Leg Content* **2**:355–379. doi:10.1152/ajplegacy.1899.2.4.355
- 1329 Jennings HS, Jamieson C. 1902. Studies on Reactions to Stimuli in Unicellular Organisms. X. The  
1330 Movements and Reactions of Pieces of Ciliate Infusoria. *Biol Bull* **3**:225–234. doi:10.2307/1535876
- 1331 Jensen P. 1893. Ueber den Geotropismus niederer Organismen. *Arch Für Gesamte Physiol Menschen Tiere*  
1332 **53**:428–480. doi:10.1007/BF01706283
- 1333 Jung I, Powers TR, Valles JM. 2014. Evidence for two extremes of ciliary motor response in a single  
1334 swimming microorganism. *Biophys J* **106**:106–113. doi:10.1016/j.bpj.2013.11.3703
- 1335 Klauke N, Plattner H. 1997. Imaging of Ca<sup>2+</sup> transients induced in Paramecium cells by a polyamine  
1336 secretagogue. *J Cell Sci* **110**:975–983.
- 1337 Knoll G, Haacke-Bell B, Plattner H. 1991. Local trichocyst exocytosis provides an efficient escape  
1338 mechanism for Paramecium cells. *Eur J Protistol* **27**:381–385. doi:10.1016/S0932-4739(11)80256-7
- 1339 Kulkarni A, Elices I, Escoubet N, Pontani L-L, Prevost AM, Brette R. 2020. A simple device to immobilize  
1340 protists for electrophysiology and microinjection. *J Exp Biol* **223**. doi:10.1242/jeb.219253
- 1341 Kung C. 1971. Genic mutants with altered system of excitation in Paramecium aurelia. II. Mutagenesis,  
1342 screening and genetic analysis of the mutants. *Genetics* **69**:29–45.
- 1343 Kung C, Saimi Y. 1985. Chapter 3 Ca<sup>2+</sup> Channels of Paramecium: A Multidisciplinary Study In: Bronner F,  
1344 Kleinzeller A, editors. Current Topics in Membranes and Transport, Genes and Membranes: Transport  
1345 Proteins and Receptors. Academic Press. pp. 45–66. doi:10.1016/S0070-2161(08)60149-5
- 1346 Kunita I, Kuroda S, Ohki K, Nakagaki T. 2014. Attempts to retreat from a dead-ended long capillary by  
1347 backward swimming in Paramecium. *Front Microbiol* **5**. doi:10.3389/fmicb.2014.00270
- 1348 Lauga E, Powers TR. 2009. The hydrodynamics of swimming microorganisms. *Rep Prog Phys* **72**:096601.  
1349 doi:10.1088/0034-4885/72/9/096601
- 1350 Lodh S, Yano J, Valentine MS, Van Houten JL. 2016. Voltage-gated calcium channels of Paramecium cilia. *J*  
1351 *Exp Biol* **219**:3028–3038. doi:10.1242/jeb.141234
- 1352 Lu Z. 2004. Mechanism of rectification in inward-rectifier K<sup>+</sup> channels. *Annu Rev Physiol* **66**:103–129.  
1353 doi:10.1146/annurev.physiol.66.032102.150822
- 1354 Machemer H. 1974. Frequency and directional responses of cilia to membrane potential changes  
1355 in Paramecium. *J Comp Physiol* **92**:293–316. doi:10.1007/BF00696617
- 1356 Machemer H. 1972. Ciliary Activity and the Origin of Metachrony in Paramecium: Effects of Increased  
1357 Viscosity. *J Exp Biol* **57**:239–259.
- 1358 Machemer H. 1969. Regulation der Cilienmetachronie bei der “Fluchtreaktion” von Paramecium\*. *J*  
1359 *Protozool* **16**:764–771. doi:10.1111/j.1550-7408.1969.tb02340.x
- 1360 Machemer H, Machemer-Röhnisch S. 1984. Mechanical and electric correlates of mechanoreceptor  
1361 activation of the ciliated tail in Paramecium. *J Comp Physiol A* **154**:273–278. doi:10.1007/BF00604993
- 1362 Machemer H, Ogura A. 1979. Ionic conductances of membranes in ciliated and deciliated Paramecium. *J*  
1363 *Physiol* **296**:49–60.

- 1364 Machemer-Röhnisch S, Machemer H. 1989. A Ca paradox: Electric and behavioural responses of  
1365 Paramecium following changes in external ion concentration. *Eur J Protistol* **25**:45–59.  
1366 doi:10.1016/S0932-4739(89)80077-X
- 1367 Martinac B, Saimi Y, Kung C. 2008. Ion Channels in Microbes. *Physiol Rev* **88**:1449–1490.  
1368 doi:10.1152/physrev.00005.2008
- 1369 Mendelssohn M. 1895. Ueber den Thermotropismus einzelliger Organismen. *Arch Für Gesamte Physiol*  
1370 *Menschen Tiere* **60**:1–27. doi:10.1007/BF01661667
- 1371 Moolenaar WH, De Goede J, Verveen AA. 1976. Membrane noise in Paramecium. *Nature* **260**:344–346.  
1372 doi:10.1038/260344a0
- 1373 Nagel U, Machemer H. 2000. Physical and physiological components of the graviresponses of wild-type  
1374 and mutant Paramecium Tetraurelia. *J Exp Biol* **203**:1059–1070.
- 1375 Naitoh Y, Eckert R. 1972. Electrophysiology of Ciliate Protozoa Exp. in *Physiol. and Biochem.* pp. 17–31.
- 1376 Naitoh Y, Kaneko H. 1972. Reactivated Triton-Extracted Models of Paramecium: Modification of Ciliary  
1377 Movement by Calcium Ions. *Science* **176**:523–524. doi:10.1126/science.176.4034.523
- 1378 Nakaoka Y, Iwatsuki K. 1992. Hyperpolarization-activated inward current associated with the frequency  
1379 increase in ciliary beating of Paramecium. *J Comp Physiol A* **170**:723–727. doi:10.1007/BF00198983
- 1380 Nakaoka Y, Machemer H. 1990. Effects of cyclic nucleotides and intracellular Ca on voltage-activated  
1381 ciliary beating in Paramecium. *J Comp Physiol A* **166**:401–406. doi:10.1007/BF00204813
- 1382 Noguchi M, Nakamura Y, Okamoto K-I. 1991. Control of ciliary orientation in ciliated sheets from  
1383 Paramecium—differential distribution of sensitivity to cyclic nucleotides. *Cell Motil* **20**:38–46.  
1384 doi:https://doi.org/10.1002/cm.970200105
- 1385 Noguchi M, Ogawa T, Taneyama T. 2000. Control of ciliary orientation through cAMP-dependent  
1386 phosphorylation of axonemal proteins in Paramecium caudatum. *Cell Motil* **45**:263–271.  
1387 doi:https://doi.org/10.1002/(SICI)1097-0169(200004)45:4<263::AID-CM2>3.0.CO;2-J
- 1388 Oami K. 1996. Distribution of chemoreceptors to quinine on the cell surface of Paramecium caudatum. *J*  
1389 *Comp Physiol A* **179**:345–352. doi:10.1007/BF00194988
- 1390 Oertel D, Schein SJ, Kung C. 1978. A potassium conductance activated by hyperpolarization in  
1391 paramecium. *J Membr Biol* **43**:169–185. doi:10.1007/BF01933477
- 1392 Oertel D, Schein SJ, Kung C. 1977. Separation of membrane currents using a Paramecium mutant. *Nature*  
1393 **268**:120–124. doi:10.1038/268120a0
- 1394 Ogura A. 1981. Deciliation and Reciliation in Paramecium after Treatment with Ethanol. *Cell Struct Funct*  
1395 **6**:43–50. doi:10.1247/csf.6.43
- 1396 Ogura A, Machemer H. 1980. Distribution of mechanoreceptor channels in the Paramecium surface  
1397 membrane. *J Comp Physiol* **135**:233–242. doi:10.1007/BF00657251
- 1398 Ohmura T, Nishigami Y, Taniguchi A, Nonaka S, Manabe J, Ishikawa T, Ichikawa M. 2018. Simple  
1399 mechanosense and response of cilia motion reveal the intrinsic habits of ciliates. *Proc Natl Acad Sci*  
1400 **115**:3231–3236. doi:10.1073/pnas.1718294115
- 1401 Oka T, Nakaoka Y, Oosawa F. 1986. Changes in Membrane Potential during Adaptation to External  
1402 Potassium Ions in Paramecium Caudatum. *J Exp Biol* **126**:111–117.

- 1403 Pallasdies F, Goedeke S, Braun W, Memmesheimer R-M. 2019. From single neurons to behavior in the  
1404 jellyfish *Aurelia aurita*. *eLife* **8**:e50084. doi:10.7554/eLife.50084
- 1405 Párducz B. 1967. Ciliary Movement and Coordination in Ciliates In: Bourne GH, Danielli JF, editors.  
1406 International Review of Cytology. Academic Press. pp. 91–128. doi:10.1016/S0074-7696(08)60812-8
- 1407 Plattner H. 2015. Molecular aspects of calcium signalling at the crossroads of unikont and bikont  
1408 eukaryote evolution--the ciliated protozoan *Paramecium* in focus. *Cell Calcium* **57**:174–185.  
1409 doi:10.1016/j.ceca.2014.12.002
- 1410 Plattner H, Klauke N. 2001. Calcium in ciliated protozoa: sources, regulation, and calcium-regulated cell  
1411 functions. *Int Rev Cytol* **201**:115–208. doi:10.1016/s0074-7696(01)01003-8
- 1412 Plattner H, Verkhratsky A. 2018. The remembrance of the things past: Conserved signalling pathways link  
1413 protozoa to mammalian nervous system. *Cell Calcium* **73**:25–39. doi:10.1016/j.ceca.2018.04.001
- 1414 Preston RR. 1998. Transmembrane Mg<sup>2+</sup> Currents and Intracellular Free Mg<sup>2+</sup> Concentration in  
1415 *Paramecium tetraurelia*. *J Membr Biol* **164**:11–24. doi:10.1007/s002329900389
- 1416 Preston RR. 1990. A magnesium current in *Paramecium*. *Science* **250**:285–288.  
1417 doi:10.1126/science.2218533
- 1418 Preston RR, Saimi Y, Kung C. 1992a. Calcium current activated upon hyperpolarization of *Paramecium*  
1419 *tetraurelia*. *J Gen Physiol* **100**:233–251. doi:10.1085/jgp.100.2.233
- 1420 Preston RR, Saimi Y, Kung C. 1992b. Calcium-dependent inactivation of the calcium current activated upon  
1421 hyperpolarization of *Paramecium tetraurelia*. *J Gen Physiol* **100**:253–268.
- 1422 Preston RR, Saimi Y, Kung C. 1990. Evidence for two K<sup>+</sup> currents activated upon hyperpolarization  
1423 of *Paramecium tetraurelia*. *J Membr Biol* **115**:41–50. doi:10.1007/BF01869104
- 1424 Roesle E. 1903. Die Reaktion einiger Infusorien auf einzelne Induktionsschläge. *Z Für Allg Physiol* 139–  
1425 168.
- 1426 Saimi Y. 1986. Calcium-dependent sodium currents in *Paramecium*: Mutational manipulations and effects  
1427 of hyper- and depolarization. *J Membr Biol* **92**:227–236. doi:10.1007/BF01869391
- 1428 Saimi Y, Hinrichsen RD, Forte M, Kung C. 1983. Mutant analysis shows that the Ca<sup>2+</sup>-induced K<sup>+</sup> current  
1429 shuts off one type of excitation in *Paramecium*. *Proc Natl Acad Sci* **80**:5112–5116.  
1430 doi:10.1073/pnas.80.16.5112
- 1431 Saimi Y, Ling KY. 1990. Calmodulin activation of calcium-dependent sodium channels in excised  
1432 membrane patches of *Paramecium*. *Science* **249**:1441–1444. doi:10.1126/science.2169650
- 1433 Satow Y, Kung C. 1980. Ca-Induced K<sup>+</sup>-Outward Current in *Paramecium Tetraurelia*. *J Exp Biol* **88**:293–  
1434 304.
- 1435 Satow Y, Kung C. 1979. Voltage Sensitive Ca-Channels and the Transient Inward Current in *Paramecium*  
1436 *Tetraurelia*. *J Exp Biol* **78**:149–161.
- 1437 Schafer WR. 2018. The Worm Connectome: Back to the Future. *Trends Neurosci* **41**:763–765.  
1438 doi:10.1016/j.tins.2018.09.002
- 1439 Sedar AW, Porter KR. 1955. The fine structure of cortical components of *Paramecium*  
1440 *multimicronucleatum*. *J Biophys Biochem Cytol* **1**:583–604. doi:10.1083/jcb.1.6.583

- 1441 Standen NB, Stanfield PR. 1982. A Binding-Site Model for Calcium Channel Inactivation that Depends on  
1442 Calcium Entry. *Proc R Soc Lond B Biol Sci* **217**:101–110. doi:10.1098/rspb.1982.0097
- 1443 Stimberg M, Brette R, Goodman DF. 2019. Brian 2, an intuitive and efficient neural simulator. *eLife*  
1444 **8**:e47314. doi:10.7554/eLife.47314
- 1445 Teska A, Stimberg M, Brette R. 2020. brian2modelfitting. Zenodo. doi:10.5281/zenodo.4601961
- 1446 Tominaga T, Naitoh Y. 1992. Membrane Potential Responses to Thermal Stimulation and the Control of  
1447 Thermoaccumulation in Paramecium Caudatum. *J Exp Biol* **164**:39–53.
- 1448 Valentine MS, Rajendran A, Yano J, Weeraratne SD, Beisson J, Cohen J, Koll F, Van Houten J. 2012.  
1449 ParameciumBBS genes are key to presence of channels in Cilia. *Cilia* **1**:16. doi:10.1186/2046-2530-1-16
- 1450 Valentine MS, Van Houten J. 2022. Ion Channels of Cilia: Paramecium as a Model. *J Eukaryot Microbiol*  
1451 e12884. doi:10.1111/jeu.12884
- 1452 Wan KY. 2020. Synchrony and symmetry-breaking in active flagellar coordination. *Philos Trans R Soc Lond*  
1453 *B Biol Sci* **375**:20190393. doi:10.1098/rstb.2019.0393
- 1454 Wang H, Swore JJ, Sharma S, Szymanski JR, Yuste R, Daniel TL, Regnier M, Bosma M, Fairhall AL. 2020.  
1455 From neuron to muscle to movement: a complete biomechanical model of Hydra contractile behaviors.  
1456 *bioRxiv* 2020.12.14.422784. doi:10.1101/2020.12.14.422784
- 1457 Wright MV, van Houten JL. 1990. Characterization of a putative Ca<sup>2+</sup>-transporting Ca<sup>2+</sup>-ATPase in the  
1458 pellicles of Paramecium tetraurelia. *Biochim Biophys Acta BBA - Biomembr* **1029**:241–251.  
1459 doi:10.1016/0005-2736(90)90160-P
- 1460 Yano J, Rajendran A, Valentine MS, Saha M, Ballif BA, Van Houten JL. 2013. Proteomic analysis of the cilia  
1461 membrane of Paramecium tetraurelia. *J Proteomics* **78**:113–122. doi:10.1016/j.jprot.2012.09.040
- 1462 Yano J, Valentine MS, Van Houten JL. 2015. Novel Insights into the Development and Function of Cilia  
1463 Using the Advantages of the Paramecium Cell and Its Many Cilia. *Cells* **4**:297–314.  
1464 doi:10.3390/cells4030297
- 1465 Zack GW, Rogers WE, Latt SA. 1977. Automatic measurement of sister chromatid exchange frequency. *J*  
1466 *Histochem Cytochem* **25**:741–753. doi:10.1177/25.7.70454
- 1467 Zhang P, Jana S, Giarra M, Vlachos PP, Jung S. 2015. Paramecia swimming in viscous flow. *Eur Phys J Spec*  
1468 *Top* **224**:3199–3210. doi:10.1140/epjst/e2015-50078-x
- 1469
